# Supplementary material for: Proteomic profiling of the monothiol glutaredoxin Grx3 reveals its global role in the regulation of iron dependent processes
Source: PLoS Genet. 2020 Jun 11;16(6):e1008881. doi: 10.1371/journal.pgen.1008881 (PMC7319344; doi:10.1371/journal.pgen.1008881)
Supplement: S1 Table — Wild-type (HLY4494) and grx3 cells carrying pMAL2-GRX3-HBH (HLY4559) were grown in YPM in the presence or absence of 500μM BPS before formaldehyde cross-linking and purification under denaturing conditions. Proteins observed in untagged control samples, previously performed unrelated HBH purifications, and an online contaminant repository called the CRAPome were all excluded from the dataset [33, 37]. Grx3-HBH interacting proteins identified by mass spectrometry are ranked in decreasing order first by count of samples each protein was observed in then by decreasing average iBAQ (intensity-based absolute quantification) value as calculated by MaxQUANT [67, 69]. Protein function was taken from the Candida Genome Database [41]. (XLSX) [file pgen.1008881.s001.xlsx]

## Sheet: Sheet1
Table S1. Grx3 interacting proteins identified by mass spectrometry.
Accession Number	ORF	Protein	Function	Grx3 6hr YPM	Grx3 16hr YPM	Grx3 6hr BPS	Grx3 16hr BPS	Count	Average LFQ
Q5AF81	orf19.2727	Grx3	Putative glutaredoxin; flucytosine induced; regulated by Gcn4p; repressed in response to amino acid starvation (3-aminotriazole treatment)	2419400000	1186300000	4029900000	1347500000	4	2245775000
				Normalized to Grx3
A0A1D8PG26	orf19.2095		Ortholog(s) have role in negative regulation of transcription from RNA polymerase II promoter in response to iron and cytosol localization	0.00277424	0.00279246	0.00146773	0.000272505	4	0.00182673
Q59W52	orf19.672	PRP28	Ortholog(s) have RNA binding, first spliceosomal transesterification activity, role in mRNA 5'-splice site recognition and U5 snRNP localization	0.00113462	0.000865127	0.000957493	0.00147985	4	0.00110927
A0A1D8PRQ4	orf19.7489.3		Ortholog(s) have 2 iron, 2 sulfur cluster binding activity	0.000255241	0.0004533	0.000377925	0.0024803	4	0.000891691
Q5AG89	orf19.4290	TRR1	Thioredoxin reductase; regulated by Tsa1/Tsa1B, Hap43; induced by nitric oxide, peroxide; oxidative stress-induce via Cap1; induced by human neutrophils; stationary phase enriched protein	0.000235166	0.000820012	0.000266012	0.00176334	4	0.000771132
P28870	orf19.6452	RBP1	Peptidyl-prolyl cis-trans isomerase; rapamycin-binding protein; homozygous null mutation confers rapamycin resistance; regulated by Gcn4p; macrophage-induced protein; repressed in response to 3-AT; functional homolog of S. cerevisiae Rbp1p	0.000499752	0.00107494	0.000471773	0.000414301	4	0.000615191
A0A1D8PJ95	orf19.1706	MET18	Putative protein with a predicted role in nucleotide excision repair (NER) and RNA polymerase II (RNAP II) transcription; Plc1p-regulated	0.00046867	0.000886032	0.000334872	0.000356067	4	0.00051141
A0A1D8PTR7	orf19.6414.3	TPM2	Putative tropomyosin isoform 2; regulated by Gcn4; repressed by amino acid starvation; macrophage-induced; protein levels decrease in stationary cells; Hap43-induced; rat catheter and Spider biofilm repressed	0.000428247	0.000847678	0.000338247	0.000375391	4	0.000497391
Q59VY8	orf19.3670	GAL1	Galactokinase; galactose, Mig1, Tup1, Hap43 regulated; fluconazole, ketoconazole-induced; stationary phase enriched protein; GlcNAc-induced protein; farnesol, hypoxia-repressed in biofilm; rat catheter and Spider biofilm induced	0.000292837	0.000693079	0.000210095	0.000505751	4	0.000425441
A0A1D8PDK6	orf19.410.3	RIB4	Lumazine synthase (6,7-dimethyl-8-ribityllumazine synthase, DMRL synthase); catalyzes the penultimate step in the synthesis of riboflavin; Hap43-induced; rat catheter and Spider biofilm repressed	2.03778e-05	0.000408337	7.93717e-05	0.000603013	4	0.000277775
A0A1D8PH93	orf19.4503		Similar to HMG-box variant of S. pombe; Spider biofilm repressed	1.54071e-05	0.000193863	2.12494e-05	0.00079436	4	0.00025622
A0A1D8PR11	orf19.6507	SPX5	Putative curved DNA-binding protein orthologous to S. pombe Cdb4; stationary phase enriched protein; rat catheter and Spider biofilm repressed	0.000142118	0.000326081	0.000134919	0.000321135	4	0.000231063
A0A1D8PEI2	orf19.4777	DAK2	Putative dihydroxyacetone kinase; repressed by yeast-hypha switch; fluconazole-induced; caspofungin repressed; protein enriched in stationary phase yeast cultures; flow model biofilm induced; rat catheter and Spider biofilm repressed	0.000236397	0.000447231	0.000133194	3.32007e-05	4	0.000212506
A0A1D8PFV7	orf19.7239	MDG1	Ortholog(s) have role in pheromone-dependent signal transduction involved in conjugation with cellular fusion and membrane raft, plasma membrane localization	0.000167637	0.000375318	0.000138202	6.64045e-05	4	0.00018689
Q59WW7	orf19.87	GPX1	Putative thiol peroxidase; rat catheter and Spider biofilm induced	0.000123225	0.000354893	0.000115839	5.11325e-05	4	0.000161272
A0A1D8PHC9	orf19.3554	AAT1	Aspartate aminotransferase; soluble protein in hyphae; macrophage-induced protein; alkaline upregulated; amphotericin B repressed; gene used for strain identification by multilocus sequence typing; farnesol-, Hap43p-induced; GlcNAc-induced	4.24981e-05	0.000123097	1.60592e-05	0.000384245	4	0.000141475
Q5AIA6	orf19.2947	SNZ1	Stationary phase protein; vitamin B synthesis; induced byyeast-hypha switch, 3-AT or in azole-resistant strain overexpressing MDR1; soluble in hyphae; regulated by Gcn4, macrophage; Spider biofilm induced; rat catheter biofilm repressed	7.53038e-05	0.000154539	4.7088e-05	0.000281321	4	0.000139563
Q59RN2	orf19.6151	ARC15	Putative ARP2/3 complex subunit; mutation confers hypersensitivity to cytochalasin D	1.6464e-05	8.82998e-05	6.6349e-06	0.000438241	4	0.00013741
A0A1D8PRH6	orf19.7178	PRE5	Alpha6 subunit of the 20S proteasome; regulated by Gcn4; induced in response to amino acid starvation (3-AT); Spider biofilm repressed	4.75283e-05	0.000145385	5.74109e-05	0.000287451	4	0.000134444
A0A1D8PF79	orf19.1153	GAD1	Putative glutamate decarboxylase; alkaline, macrophage-downregulated gene; amphotericin B induced; induced by Mnl1 under weak acid stress; stationary phase enriched protein; rat catheter biofilm repressed	1.67446e-05	0.000138237	1.23743e-05	0.000345135	4	0.000128123
Q9HEW1	orf19.2014	BCY1	Protein kinase A regulatory subunit; involved in regulation of filamentation, phenotypic switching and mating; required for nuclear localization of Tpk1; physically interacts with Tpk1; apoptosis-regulated	5.61668e-05	0.000223274	4.1676e-05	0.000182471	4	0.000125897
A0A1D8PDB0	orf19.1058		Ortholog(s) have ubiquitin binding activity, role in ubiquitin-dependent protein catabolic process and proteasome regulatory particle, lid subcomplex, proteasome storage granule localization	1.79396e-05	4.88418e-05	1.53205e-05	0.000366679	4	0.000112195
Q9P975	orf19.7626	EIF4E	Translation initiation factor eIF4E; genes encoding ribosomal subunits, translation factors, tRNA synthetases downregulated by phagocytosis by macrophage; alternatively spliced intron in 5' UTR; protein levels decrease in stationary phase	0.000106588	0.000163694	3.96064e-05	0.000110241	4	0.000105032
Q59ZH8	orf19.3541	ERF1	Putative translation release factor 1, which interacts with stop codons and promotes release of nascent peptides from ribosomes; Hap43p-induced gene	0.000110957	0.000226637	5.87335e-05	1.45937e-05	4	0.00010273
Q5AED0	orf19.338		Putative glycoside hydrolase; stationary phase enriched protein; Hog1p-downregulated; shows colony morphology-related gene regulation by Ssn6p	5.36455e-05	0.00015915	2.42088e-05	0.000133002	4	9.25016e-05
A0A1D8PHU6	orf19.2269		Putative 3-phosphoserine phosphatase; induced by benomyl or in azole-resistant strain that overexpresses MDR1; early-stage flow model biofilm induced; Spider biofilm repressed	6.97322e-05	0.000122928	9.58485e-06	0.00014895	4	8.77988e-05
A0A1D8PQM9	orf19.7064	GLN4	Putative tRNA-Gln synthetase; genes encoding ribosomal subunits, translation factors, tRNA synthetases are downregulated upon phagocytosis by murine macrophage; protein present in exponential and stationary growth phase yeast cultures	7.71472e-05	0.000168811	5.96243e-05	2.56304e-05	4	8.28031e-05
Q5A1M1	orf19.1974	TFS1	Putative carboxypeptidase y inhibitor; transcript regulated upon yeast-hypha switch; colony morphology-related gene regulation by Ssn6	5.7754e-05	0.000188005	5.28425e-05	2.78197e-05	4	8.16052e-05
Q59T49	orf19.6868	GRE24	Putative NADPH-dependent methylglyoxal reductase; homozygous transposon insertion causes decreased colony wrinkling under filamentous growth-inducing conditions, but does not block true hyphal formation in liquid media	1.5954e-05	7.47408e-05	3.28271e-05	0.000194694	4	7.95539e-05
A0A1D8PFX8	orf19.7261	GDI1	Putative Rab GDP-dissociation inhibitor; GlcNAc-induced protein; Spider biofilm repressed	6.66074e-05	0.000177013	3.83211e-05	3.19095e-05	4	7.84626e-05
Q59Z11	orf19.2289	ARP3	Protein with Myo5p-dependent localization to cortical actin patches at hyphal tip; mutation confers hypersensitivity to cytochalasin D; Spider biofilm repressed	3.53914e-05	0.000138414	2.5688e-05	7.34026e-05	4	6.82239e-05
A0A1D8PP67	orf19.4024	RIB5	Putative riboflavin synthase; fungal-specific (no human or murine homolog); farnesol-downregulated; protein present in exponential and stationary growth phase yeast cultures	2.39985e-05	0.000164579	2.74647e-05	5.28868e-05	4	6.72322e-05
Q59RN6	orf19.6147		Putative histone chaperone; role in chromatin remodeling; rat catheter and Spider biofilm repressed	5.21948e-05	0.000100717	3.95518e-05	6.14033e-05	4	6.34666e-05
P13649	orf19.1716	URA3	Orotidine-5'-phosphate decarboxylase; pyrimidine biosynthesis; gene used as genetic marker; decreased expression when integrated at ectopic chromosomal locations can cause defects in hyphal growth and virulence; Spider biofilm repressed	3.65843e-06	5.45671e-06	5.90536e-06	0.000217996	4	5.82542e-05
Q59QT3	orf19.2640	FUR1	Uracil phosphoribosyltransferase; predicted tetrameric enzyme of pyrimidine salvage; mutations associated with flucytosine resistance in clade I clinical isolates; flucytosine, macrophage-induced protein; levels decrease in stationary phase	5.95354e-05	8.77518e-05	3.88992e-05	3.97365e-05	4	5.64808e-05
A0A1D8PLN9	orf19.2710	GLC8	Ortholog(s) have enzyme activator activity and role in chromosome segregation	5.88741e-06	0.000107249	2.01107e-05	8.78516e-05	4	5.52748e-05
Q5A3K7	orf19.5263	SER33	Predicted enzyme of amino acid biosynthesis; Gcn4p-regulated; upregulated in biofilm; protein present in exponential and stationary growth phase yeast cultures; S. cerevisiae ortholog is Gcn4p regulated	4.43581e-05	0.000102917	4.56562e-05	1.99317e-05	4	5.32157e-05
A0A1D8PCP6	orf19.3683	AGE3	Putative ADP-ribosylation factor GTPase activating protein, functional ortholog of S. cerevisiae GCS1; mutation affects endocytosis, hyphal growth, chemical and drug resistance, and sensitivity to cell wall inhibitors	3.90899e-05	0.000101838	3.10405e-05	2.36475e-05	4	4.89039e-05
Q5AD20	orf19.2047		Putative protein of unknown function; Hap43p-repressed gene; mutation confers hypersensitivity to toxic ergosterol analog, and to amphotericin B	9.32463e-06	4.6366e-05	1.04318e-05	0.000125677	4	4.79499e-05
A0A1D8PJ10	orf19.6160		Ortholog(s) have role in eisosome assembly and eisosome, membrane raft localization	1.79635e-05	9.49675e-05	1.59173e-05	5.87562e-05	4	4.69011e-05
A0A1D8PH55	orf19.802	UGA1	Putative GABA transaminase; transcription regulated by Mig1 and Tup1; stationary phase enriched protein; rat catheter and Spider biofilm induced	1.92415e-05	0.000131889	1.48877e-05	1.86686e-05	4	4.61717e-05
A0A1D8PTK1	orf19.1986	ARO2	Putative chorismate synthase; fungal-specific (no human or murine homolog); protein level decreased in stationary phase yeast cultures; GlcNAc-induced protein	4.73134e-05	9.14946e-05	1.48542e-05	1.61306e-05	4	4.24482e-05
A0A1D8PU04	orf19.6596		Putative esterase; possibly transcriptionally regulated by Tac1; induced by Mnl1 under weak acid stress; protein present in exponential and stationary growth phase yeast cultures; Spider biofilm repressed	4.53046e-05	7.42679e-05	7.69796e-06	3.0374e-05	4	3.94111e-05
Q5A943	orf19.3291	HMT1	Major type I protein arginine methyltransferase (PRMT); involved in asymmetric dimethylation of arginine residues; involved in nuclear export of Npl3p; Spider biofilm repressed	2.40655e-05	6.26031e-05	3.25542e-05	3.19666e-05	4	3.77973e-05
Q5ADM5	orf19.6816		Putative xylose and arabinose reductase; flow model biofilm induced; Spider biofilm repressed	1.02728e-05	5.25685e-05	1.12849e-05	6.09699e-05	4	3.3774e-05
Q5A473	orf19.1236	GVP36	BAR domain protein; ocalizes to early and late Golgi vesicles; predicted role in adaptation to varying nutrient concentrations, fluid-phase endocytosis, actin cytoskeleton polarization and vacuole biogenesis; rat catheter biofilm repressed	6.86121e-06	5.898e-05	1.59577e-05	4.59829e-05	4	3.19455e-05
A0A1D8PDA4	orf19.6837	FMA1	Putative oxidoreductase; induced by ciclopirox olamine; upregulation correlates with clinical development of fluconazole resistance; Spider biofilm repressed	1.53592e-05	6.34469e-05	2.7688e-05	1.67436e-05	4	3.08094e-05
Q59YH1	orf19.1355	SOL2	Putative protein of unknown function; stationary phase enriched protein	3.04807e-05	6.30582e-05	1.06454e-05	7.68089e-06	4	2.79663e-05
A0A1D8PE45	orf19.5054		Putative quinolinate phosphoribosyl transferase, involved in NAD biosynthesis; Hap43p-repressed gene	1.95404e-05	2.88308e-05	2.57351e-05	2.98456e-05	4	2.5988e-05
A0A1D8PC77	orf19.6063	UBP6	Putative ubiquitin-specific protease of the 26S proteasome; oxidative stress-induced via Cap1p	1.03067e-05	6.43421e-05	1.76267e-05	1.00341e-05	4	2.55774e-05
A0A1D8PLK1	orf19.2755		Ortholog(s) have role in proteasomal ubiquitin-independent protein catabolic process, proteasome-mediated ubiquitin-dependent protein catabolic process and proteasome core complex, beta-subunit complex localization	6.44829e-06	2.80376e-05	6.25425e-06	6.10212e-05	4	2.54403e-05
Q5ADN2	orf19.6809	PMU1	Putative phosphomutase-like protein; protein present in exponential and stationary growth phase yeast; Hap43-repressed; Spider biofilm repressed	1.66975e-05	4.39189e-05	1.8792e-05	1.90234e-05	4	2.4608e-05
Q5AF71	orf19.2737		Carbohydrate kinase domain-containing protein; Spider biofilm induced	1.4726e-05	3.3505e-05	4.95372e-06	4.36861e-05	4	2.42177e-05
Q8TG40	orf19.6074	HBR1	Essential protein involved in regulation of MTL gene expression; hemoglobin-regulated inhibitor of white-opaque switching, may affect survival in host; activator of MTLalpha1 and MTLalpha2; transcript activated by hemoglobin	2.05154e-05	4.2888e-05	1.62528e-05	1.60059e-05	4	2.39155e-05
A0A1D8PGL6	orf19.1553	ENT3	Putative epsin; induced during the mating process; transcript is upregulated in an RHE model of oral candidiasis	1.22369e-05	4.12349e-05	9.4119e-06	3.09989e-05	4	2.34707e-05
P39827	orf19.548	CDC10	Septin, required for wild-type cell, hyphal, or chlamydospore morphology; role in virulence and kidney tissue invasion in mouse infection; forms ring at sites of cell division and filaments in mature chlamydospore; Spider biofilm repressed	1.58944e-05	2.17576e-05	2.01717e-05	2.56742e-05	4	2.08745e-05
Q59N40	orf19.6287	AAT21	Putative aspartate aminotransferase; stationary phase enriched protein; Gcn4-regulated; Spider biofilm induced	1.63437e-05	2.87752e-05	1.10427e-05	1.25158e-05	4	1.71693e-05
A0A1D8PJ80	orf19.1683	PPH21	Catalytic subunit of protein phosphatase of the Type 2A-related family (serine/threonine-specific), involved in dephosphorylation of septin Sep7p; caspofungin repressed; possibly an essential gene, disruptants not obtained by UAU1 method	1.01695e-05	3.44483e-05	2.83754e-06	1.75941e-05	4	1.62623e-05
Q5A850	orf19.3278	GSY1	UDP glucose/starch glucosyltransferase; transcript repressed by yeast-hyphal switch, Efg1-regulated; strong oxidative stress induced; colony morphology-related regulation by Ssn6; stationary phase enriched; flow model biofilm induced	1.09763e-05	2.60659e-05	7.87166e-06	1.5295e-05	4	1.50522e-05
Q59WW3	orf19.89	PEX7	Ortholog(s) have peroxisome matrix targeting signal-2 binding activity and role in fatty acid metabolic process, protein import into peroxisome matrix, protein import into peroxisome matrix, docking, protein targeting to peroxisome	1.06617e-05	2.92262e-05	4.24229e-06	1.4538e-05	4	1.46671e-05
A0A1D8PK48	orf19.5985	PAC10	Ortholog(s) have tubulin binding activity, role in response to cold, tubulin complex assembly and cytoplasm, polysome, prefoldin complex localization	1.08105e-05	2.03304e-05	5.58103e-06	1.70293e-05	4	1.34378e-05
A0A1D8PRR3	orf19.7479	NTH1	Neutral trehalase; hyphal induction in mutant delayed but not reduced overall; not required for virulence in mice; possible regulatory cAMP-dependent phosphorylation at S10,S213; Hap43-repressed gene; Spider biofilm induced	1.09345e-05	3.20652e-05	5.32222e-06	3.1672e-06	4	1.28723e-05
Q5AJ82	orf19.1711	END3	Regulated by Gcn4p; induced in response to amino acid starvation (3-aminotriazole treatment)	2.89969e-06	4.20079e-06	2.10149e-06	3.90338e-05	4	1.20589e-05
A0A1D8PCX6	orf19.3006	GGA2	Protein involved in Golgi trafficking; rat catheter and Spider biofilm repressed	3.71927e-06	2.67833e-05	3.15095e-06	9.7603e-06	4	1.08534e-05
A0A1D8PMB3	orf19.1290	XKS1	Putative xylulokinase; Hap43-repressed; induced by prostaglandins; rat catheter biofilm repressed	3.85658e-06	8.19683e-06	3.42664e-06	1.30056e-05	4	7.1214e-06
A0A1D8PQH5	orf19.7111.1	SOD3	Cytosolic manganese-containing superoxide dismutase; protects against oxidative stress; repressed by ciclopirox olamine, induced during stationary phase when SOD1 expression is low; Hap43-repressed; Spider and flow model biofilm induced	8.71497e-06	0.000200826		0.00144289	3	0.000550812
Q5AKW1	orf19.5016		Ortholog(s) have role in [4Fe-4S] cluster assembly, protein maturation by [4Fe-4S] cluster transfer and mitochondrial matrix localization	0.000216273	7.00354e-05	0.000333805		3	0.000206704
A0A1D8PMF8	orf19.4413	CMD1	Calmodulin; calmodulin inhibitors cause a defect in hyphal growth; transcript not regulated by yeast-hyphal transition; mutation confers hypersensitivity to cytochalasin D and high concentrations of tunicamycin; gene has intron	0.000143159	0.000296873	0.000125519		3	0.000188517
Q5A513	orf19.933	UBC13	Ortholog(s) have ubiquitin conjugating enzyme activity, ubiquitin protein ligase activity, ubiquitin-protein transferase activity	7.56758e-06	3.55231e-05		0.000454961	3	0.000166017
Q59LQ6	orf19.1280	SUI1	Putative translation initiation factor; flucytosine induced; genes encoding ribosomal subunits, translation factors, and tRNA synthetases are downregulated upon phagocytosis by murine macrophage	6.53757e-05	0.000222735	0.000137884		3	0.000141998
Q59T95	orf19.4536	CYS4	Cystathionine beta-synthase; sulfur amino acid biosynthesis; antigenic in mouse; flow model biofilm induced; alkaline induced; macrophage/pseudohyphal-induced; present in exponential and stationary growth phase yeast cultures	9.99793e-05	0.000201602	8.72602e-05		3	0.000129614
A0A1D8PRF3	orf19.7199		Ortholog(s) have role in posttranslational protein targeting to endoplasmic reticulum membrane and TRC complex, cytoplasm localization	6.20195e-05	0.000279128	4.47083e-05		3	0.000128619
Q5AD10	orf19.2057	YTA12	Ortholog(s) have ATP binding, ATPase activity, metallopeptidase activity and role in cellular protein-containing complex assembly, proteolysis, signal peptide processing	9.42878e-06	4.3779e-05	0.000283977		3	0.000112395
Q5AML3	orf19.4633		Ortholog(s) have carbonyl reductase (NADPH) activity, oxidoreductase activity, serine 3-dehydrogenase activity	7.56882e-05	0.00019023	5.57384e-05		3	0.000107219
Q5ACI8	orf19.7654	CPR6	Putative peptidyl-prolyl cis-trans isomerase; macrophage/pseudohyphal-repressed; heavy metal (cadmium) stress-induced; heterozygous null mutant displays sensitivity to virgineone; rat catheter biofilm induced	0.000121679	0.000133204	6.02422e-05		3	0.000105042
A0A1D8PR39	orf19.6470	AHP2	Putative thiol-specific peroxiredoxin; macrophage-downregulated gene	3.0043e-05	7.59369e-05		0.000208156	3	0.000104712
Q5A218	orf19.2825	DRE2	Putative cytosolic Fe-S protein assembly protein; a-specific transcript; regulated by Sef1, Sfu1, and Hap43; rat catheter and Spider biofilm induced	0.000122869	3.46245e-05	0.000116219		3	9.12375e-05
Q59NQ5	orf19.4147	GLR1	Glutathione reductase; upregulated by human neutrophils; oxidative stress-induced regulation via Cap1p; overexpression correlates with multidrug resistance in a cap1 mutant, farnesol induced; stationary phase enriched protein	3.97074e-05	0.000142047	2.93506e-05		3	7.03682e-05
A0A1D8PKV4	orf19.6724	FUM12	Putative fumarate hydratase; enzyme of citric acid cycle; fluconazole, Efg1 repressed; induced in high iron; protein present in exponential and stationary growth phase	2.40014e-05	0.000169788	1.03067e-05		3	6.80322e-05
A0A1D8PTY0	orf19.7322		Protein of unknown function; S. cerevisae ortholog Ypl225w interacts with ribosomes; rat catheter biofilm induced	5.30255e-05	0.000109433	3.71845e-05		3	6.65476e-05
Q5AMQ2	orf19.4594	CLC1	Clathrin light chain; subunit of the major coat protein involved in intracellular protein transport and endocytosis; rat cathetr and Spider biofilm repressed	2.72522e-05	0.000153393	1.77828e-05		3	6.61426e-05
A0A1D8PQI4	orf19.7108	RPE1	D-ribulose-5-phosphate 3-epimerase; stationary phase enriched protein	6.85625e-05	8.85526e-05	3.89762e-05		3	6.53637e-05
A0A1D8PJD7	orf19.1649	RNA1	Putative GTPase-activating protein; protein level decreases in stationary phase cultures; Spider biofilm repressed	5.11986e-05	0.000103515	3.64873e-05		3	6.37337e-05
A0A1D8PJ20	orf19.5378	SCL1	Proteasome subunit YC7alpha; protein present in exponential and stationary growth phase yeast cultures; flow model and Spider biofilm repressed	4.92932e-05	0.000104805	3.12861e-05		3	6.17947e-05
A0A1D8PFI3	orf19.6344	RBK1	Has domain(s) with predicted ribokinase activity and role in D-ribose metabolic process	0.000175234	6.45562e-06	1.94231e-06		3	6.12105e-05
Q5A2T2	orf19.2183	KRE30	YEF3-subfamily ABC family protein; predicted not to be a transporter; repressed in core stress response; mutation confers hypersensitivity to amphotericin B	3.00041e-05	0.000114347	2.75962e-05		3	5.73158e-05
Q5AD39	orf19.2028	MXR1	Putative methionine sulfoxide reductase; Plc1-regulated; induced by human neutrophils, flucytosine; macrophage regulated (gene induced, protein decreased); possibly adherence-induced; Spider biofilm induced	5.21576e-05	6.75276e-05	4.93188e-05		3	5.63347e-05
Q59Z14	orf19.2286		Putative deoxyhypusine hydroxylase; ketoconazole-induced; protein level decreases in stationary phase cultures; required for biofilm formation; Spider biofilm repressed	4.21551e-05	0.000102234	2.39664e-05		3	5.61184e-05
P0CT51	orf19.4914.1	BLP1	Protein of unknown function, serum-induced	3.61152e-05	5.1911e-05	7.72277e-05		3	5.50846e-05
A0A1D8PDX5	orf19.6220.3	MMD1	Mitochondrial protein; possibly required for transamination of isoleucine; macrophage-downregulated protein abundance; rat catheter and Spider biofilm repressed		4.74079e-05	5.31179e-05	6.3134e-05	3	5.45533e-05
A0A1D8PSU2	orf19.550	PDX3	Pyridoxamine-phosphate oxidase; transcript regulated by yeast-hypha switch and by Nrg1, Mig1, Tup1; Hap43, caspofungin repressed; present in exponential and stationary phase yeast cultures	6.91783e-05	5.3049e-05	3.97206e-05		3	5.39826e-05
A0A1D8PRC2	orf19.1339	CPY1	Carboxypeptidase Y; transcript regulated at yeast-hypha transition or macrophage response; induced human neutrophils; regulated by Gcn2 and Gcn4; putative N-glycosylation	1.45069e-05	8.38565e-05		5.78115e-05	3	5.20583e-05
A0A1D8PQL1	orf19.7069		Putative AdoMet-dependent proline methyltransferase; Hap43-induced; required for normal flow model biofilm growth; Spider biofilm repressed	2.86728e-05	7.27244e-05	5.30187e-05		3	5.1472e-05
Q5A3V6	orf19.5228	RIB3	3,4-Dihydroxy-2-butanone 4-phosphate synthase; homodimeric enzyme of riboflavin biosynthesis; converts ribulose 5-phosphate to L-3,4-dihydroxy-2-butanone 4-phosphate; transcription regulated on yeast-hyphal switch, macrophage interaction	3.76845e-06	7.85012e-06		0.000141121	3	5.09131e-05
A0A1D8PL85	orf19.4669	AAT22	Aspartate aminotransferase; nitrogen metabolism; similar but not orthologous to S. cerevisiae Aat2; clade-associated gene expression; protein levels decrease in stationary phase yeast; mutant is viable; flow model biofilm repressed	5.53939e-05	5.5271e-05	4.11673e-05		3	5.06107e-05
Q59SK8	orf19.4164		Has domain(s) with predicted translation initiation factor activity and role in translational initiation	3.77515e-05	6.72174e-05	4.64007e-05		3	5.04565e-05
P46586	orf19.4026	HIS1	ATP phosphoribosyl transferase; enzyme of histidine biosynthesis; acid upregulated/alkaline repressed by Rim101; regulated by Gcn2, Gcn4; strain CA9 is a his1 mutant; flow model biofilm induced; Spider biofilm repressed	5.06283e-05	7.19388e-05	2.27748e-05		3	4.84473e-05
Q59Z65	orf19.2233	PRE2	Putative proteasome beta-5 subunit; macrophage-induced protein	2.83694e-05	0.00010397	1.08799e-05		3	4.77399e-05
A0A1D8PKW2	orf19.6178	FBP1	Fructose-1,6-bisphosphatase; key gluconeogenesis enzyme; regulated by Efg1, Ssn6; induced by phagocytosis; effects switch from glycolysis to gluconeogenesis in macrophage; rat flow model biofilm induced; overlaps orf19.6179	3.18835e-05	9.44365e-05	1.31194e-05		3	4.64798e-05
Q59N80	orf19.1108	HAM1	Putative deoxyribonucleoside triphosphate pyrophosphohydrolase; caspofungin repressed; regulated by Gcn2p and Gcn4p	4.47921e-05	8.22676e-05	1.0604e-05		3	4.58879e-05
A0A1D8PPV6	orf19.3475		Described as a Gag-related protein; hyphal induced; downregulation correlates with clinical development of fluconazole resistance; repressed by nitric oxide, 17-beta-estradiol, ethynyl estradiol	3.88857e-05	3.00826e-05	6.588e-05		3	4.49494e-05
A0A1D8PS15	orf19.2549	SHP1	Regulator of the type 1 protein phosphatase Glc7p activity, involved in control of morphogenesis, progression through the cell cycle and response to DNA damage	2.13524e-05	0.000100051	1.29842e-05		3	4.47957e-05
Q5A3P4	orf19.5226	WRS1	Putative tRNA-Trp synthetase; genes encoding ribosomal subunits, translation factors, tRNA synthetases are downregulated upon phagocytosis by murine macrophages	4.7334e-05	5.45629e-05	3.14102e-05		3	4.44357e-05
Q5AG86	orf19.4293		Ortholog(s) have role in protein maturation by iron-sulfur cluster transfer, tRNA wobble uridine modification and CIA complex, cytosol, nucleus localization	3.43395e-05	6.38085e-05	3.33581e-05		3	4.38354e-05
A0A1D8PQI0	orf19.7109		Ortholog of S. cerevisiae : YGL242C, C. glabrata CBS138 : CAGL0H07755g, C. dubliniensis CD36 : Cd36_70350, C. parapsilosis CDC317 : CPAR2_300160 and Candida tenuis NRRL Y-1498 : CANTEDRAFT_113872	3.04013e-05	5.9184e-05		3.99688e-05	3	4.31847e-05
A0A1D8PMA1	orf19.1789.1	LYS1	Saccharopine dehydrogenase (biosynthetic); enzyme of alpha-aminoadipate lysine biosynthesis pathway; functionally complements S. cerevisiae lys1 mutation; fungal-specific (no human or murine homolog)	3.5336e-05	8.26949e-05	7.2647e-06		3	4.17652e-05
Q5AMP9	orf19.4597	CAP2	Putative F-actin-capping protein subunit beta; possibly an essential gene, disruptants not obtained by UAU1 method	2.26221e-05	8.56023e-05	1.67771e-05		3	4.16672e-05
Q5ABA2	orf19.6068	SVF1	Putative survival factor; stationary phase enriched protein; fluconazole-induced; regulated by Gcn4p; repressed in response to amino acid starvation (3-AT treatment); fungal-specific (no human or murine homolog)	3.80553e-05	5.80974e-05	2.65739e-05		3	4.09089e-05
A0A1D8PRI6	orf19.7160	YAR1	Ortholog(s) have unfolded protein binding activity	5.38729e-05	2.58333e-05		3.87154e-05	3	3.94738e-05
Q5AIA0	orf19.2953	TOM20	Putative mitochondrial primary import receptor	2.53034e-05	6.51977e-05	2.7631e-05		3	3.93773e-05
A0A1D8PRB6	orf19.1336	PUP3	Putative beta 3 subunit of the 20S proteasome; macrophage/pseudohyphal-repressed	1.66731e-05	8.50207e-05	1.5721e-05		3	3.91383e-05
Q5ANE2	orf19.5961	NAS6	Ortholog(s) have proteasome regulatory particle binding activity, role in proteasome regulatory particle assembly and cytosol, nucleus localization	3.21055e-05	4.81219e-05	3.4244e-05		3	3.81571e-05
A0A1D8PFV8	orf19.7214		Glucan 1,3-beta-glucosidase; regulated by Nrg1, Tup1 and possibly Tac1; induced by NO and during cell wall regeneration; stationary phase enriched; possibly essential (UAU1 method); F-12/CO2 early biofilm induced; flow biofilm repressed		7.59639e-05	3.579e-06	3.33796e-05	3	3.76408e-05
Q5AP79	orf19.4885	MIR1	Putative mitochondrial phosphate transporter; caspofungin repressed; expression is increased in a fluconazole-resistant isolate; induced upon adherence to polystyrene	3.39336e-05	6.60238e-05	1.03328e-05		3	3.67634e-05
A0A1D8PLE6	orf19.4639		Protein present in exponential and stationary growth phase yeast cultures	1.90584e-05	6.1664e-05		2.70642e-05	3	3.59289e-05
Q59P52	orf19.7109		Ortholog of S. cerevisiae : YGL242C, C. glabrata CBS138 : CAGL0H07755g, C. dubliniensis CD36 : Cd36_70350, C. parapsilosis CDC317 : CPAR2_300160 and Candida tenuis NRRL Y-1498 : CANTEDRAFT_113872	3.22551e-05	6.06347e-05	1.24058e-05		3	3.50985e-05
Q5ABD0	orf19.6040	SNF7	ESCRT III complex protein; role in proteolytic activation of Rim101 and Rim8 processing/activation; separable roles in RIM101 pathway and in transport from MVB to vacuole; involved in echinocandin and azole sensitivity	2.44222e-05	6.39206e-05	1.62153e-05		3	3.48527e-05
Q59UY8	orf19.3752	RAD51	Protein involved in homologous recombination and DNA repair; flucytosine induced; slow growth and increased white-to-opaque switching frequency in null mutant	2.0925e-05	6.90702e-05	1.15288e-05		3	3.38414e-05
Q5APD4	orf19.4831	MTS1	Sphingolipid C9-methyltransferase; catalyzes methylation of the 9th carbon in the long chain base component of glucosylceramides; glucosylceramide biosynthesis is important for virulence; Spider biofilm repressed	5.39307e-06	1.35817e-05		8.15288e-05	3	3.35012e-05
A0A1D8PJK2	orf19.297	DTD2	Ortholog(s) have D-leucyl-tRNA(Leu) deacylase activity, D-tyrosyl-tRNA(Tyr) deacylase activity and role in D-leucine catabolic process, D-tyrosine catabolic process, tRNA metabolic process	1.29735e-05	3.08952e-05	5.58997e-05		3	3.32561e-05
A0A1D8PRB4	orf19.1338		Protein of unknown function; possible COPI-coated vesicle, Golgi apparatus, ribosome localization; rat catheter biofilm repressed	6.41771e-06	6.14844e-05		2.96646e-05	3	3.25222e-05
Q59XU5	orf19.1760	RAS1	RAS signal transduction GTPase; regulates cAMP and MAP kinase pathways; role in hyphal induction, virulence, apoptosis, heat-shock sensitivity; nonessential; plasma membrane-localized; complements viability of S. cerevisiae ras1 ras2 mutant	8.09788e-06	3.47846e-05		5.28994e-05	3	3.19273e-05
A0A1D8PQ54	orf19.5620	PHZ1	Stationary phase enriched protein; Gcn4-regulated; induced by amino acid starvation (3-AT), benomyl or in azole-resistant strain that overexpresses MDR1; flow model biofilm induced; rat catheter biofilm repressed; overlaps orf19.5621		5.13192e-05	3.33507e-06	4.10308e-05	3	3.1895e-05
A0A1D8PPH3	orf19.92		Protein with a predicted thioredoxin-like domain; Hap43-repressed; induced by prostaglandins	2.80677e-05	5.10807e-05	1.51185e-05		3	3.14223e-05
Q5A744	orf19.5118	SDS24	Protein similar to S. cerevisiae Sds24 involved in cell separation during budding; transcript regulated by Mig1 and Tup1; fluconazole-induced; flow model biofilm induced	2.34376e-05	5.83529e-05	1.0304e-05		3	3.06982e-05
Q59K86	orf19.3515	BNA1	Putative 3-hydroxyanthranilic acid dioxygenase, involved in NAD biosynthesis; Hap43p-repressed gene	1.11945e-05	7.09247e-05	6.4421e-06		3	2.95204e-05
Q5A0I6	orf19.5825	NCB2	Beta subunit of NC2, heterodimeric regulator of transcription; activates CDR1 transcription; possibly an essential gene, disruptants not obtained by UAU1 method; conditional mutants show decreased susceptibility to azoles		3.87802e-05	7.56793e-06	4.0964e-05	3	2.91041e-05
A0A1D8PHG1	orf19.6883	KES1	Putative oxysterol binding protein family; probable peripheral membrane protein of the Golgi complex; flow model and Spider biofilm repressed	6.02877e-06	6.41296e-05	9.1568e-06		3	2.64384e-05
A0A1D8PJD2	orf19.1626	DYS1	Deoxyhypusine synthase; catalyzes formation of deoxyhypusine, the first step in hypusine biosynthesis; Spider biofilm repressed	2.83587e-05	4.04594e-05	1.0137e-05		3	2.63184e-05
Q5A779	orf19.5083	DRG1	Member of the DRG family of GTP-binding proteins; involved in regulation of invasive filamentous growth	1.97256e-05	4.51092e-05	1.05494e-05		3	2.5128e-05
A0A1D8PTZ1	orf19.7328	CAP100	Protein with a Staphylococcal nuclease domain; transcript regulated by Mig1 and Tup1; flow model and Spider biofilm repressed	1.85819e-05	4.93804e-05	5.88427e-06		3	2.46155e-05
Q59WF0	orf19.2351	NIT3	Putative nitrilase; regulated by Gcn2p and Gcn4p; protein present in exponential and stationary growth phase yeast cultures	1.44986e-05	4.44163e-05	1.30219e-05		3	2.39789e-05
A0A1D8PEZ9	orf19.2333		Ortholog(s) have role in retrograde transport, endosome to Golgi and cytoplasm, late endosome localization	2.66975e-05	2.88696e-05	1.6187e-05		3	2.3918e-05
A0A1D8PHR2	orf19.2228	TWF1	Ortholog(s) have actin filament binding, actin monomer binding activity	2.3734e-05	3.70446e-05	7.94635e-06		3	2.29083e-05
A0A1D8PFF9	orf19.6358	MMS2	Ortholog(s) have ubiquitin conjugating enzyme activity, ubiquitin-protein transferase activity and role in free ubiquitin chain polymerization, postreplication repair, protein K63-linked ubiquitination, protein polyubiquitination	1.1426e-05	3.504e-05	2.13266e-05		3	2.25975e-05
A0A1D8PJA9	orf19.1658		Ortholog(s) have cell cortex localization	9.05059e-06	5.42333e-05	4.2011e-06		3	2.2495e-05
P30418	orf19.4641	NMT1	Myristoyl-CoA:protein N-myristoyltransferase; attaches the fatty acid myristate to a small number of proteins at an N-terminal Gly; essential; antifungal drug target; functional homolog of S. cerevisiae Nmt1p	1.31404e-05	3.21613e-05	2.18718e-05		3	2.23912e-05
Q5AH60	orf19.6477		Ortholog(s) have tRNA (guanine-N7-)-methyltransferase activity, role in tRNA (guanine-N7)-methylation and cytosol, nucleus, tRNA (m7G46) methyltransferase complex localization	2.13045e-05	3.33836e-05	1.20906e-05		3	2.22596e-05
Q5A5B2	orf19.5168		Ortholog(s) have role in maturation of SSU-rRNA	6.6037e-06	3.27261e-05	2.46311e-05		3	2.13203e-05
Q5A8X6	orf19.3358	LSC1	Putative succinate-CoA ligase subunit; induced by high iron; fluconazole-induced; protein present in exponential and stationary growth phase yeast cultures; Spider biofilm repressed	7.98917e-06	3.8089e-05	1.73989e-05		3	2.1159e-05
A0A1D8PCI5	orf19.3341		Putative tRNA-Arg synthetase; essential; genes encoding ribosomal subunits, translation factors, and tRNA synthetases are downregulated upon phagocytosis by murine macrophage; downregulated by growth in the mouse cecum	1.16909e-05	4.39897e-05	7.32326e-06		3	2.10013e-05
Q5AK46	orf19.3974	PUT2	Putative delta-1-pyrroline-5-carboxylate dehydrogenase; alkaline upregulated; protein present in exponential and stationary growth phase yeast cultures; flow model biofilm induced; Spider biofilm induced	1.28168e-05	3.79179e-05		1.1859e-05	3	2.08646e-05
P56553	orf19.2722	CGR1	Negative regulator of yeast-form growth; HSP70 family member; induced by growth cessation at yeast-hyphal transition or in planktonic growth; physically interacts with Msi3p; similar to rat anti-aging gene, SMP30, stationary phase enriched	7.35678e-06	3.17348e-05		2.26323e-05	3	2.05746e-05
A0A1D8PPR5	orf19.3396	HCH1	Ortholog of S. cerevisiae Hch1, a regulator of heat shock protein Hsp90; regulated by Gcn4; induced in response to amino acid starvation (3-aminotriazole treatment); mutants are viable	1.98884e-05	2.00379e-05	2.04903e-05		3	2.01389e-05
Q92210	orf19.5906	ADE2	Phosphoribosylaminoimadazole carboxylase; role in adenine biosynthesis; required for normal growth and virulence in immunosuppressed mouse infection; not induced in GCN response, in contrast to S. cerevisiae ADE2; stationary phase-enriched	1.73485e-05	3.55635e-05	6.36145e-06		3	1.97578e-05
O93852	orf19.7551	ALO1	D-Arabinono-1,4-lactone oxidase involved in biosynthesis of dehydro-D-arabinono-1,4-lactone, which has a protective role against oxidative damage; plasma membrane-localized;required for full virulence in a mouse model of systemic infection	3.89349e-06	3.18065e-05		2.15763e-05	3	1.90921e-05
Q5ADR1	orf19.6780	MET8	Putative bifunctional dehydrogenase and ferrochelatase with a predicted role in siroheme biosynthesis; regulated by Gcn2p and Gcn4p	4.82227e-06	2.86648e-05	2.29457e-05		3	1.88109e-05
Q5ALN3	orf19.1544		Putative cis-golgi localized protein involved in ER to Golgi transport; Spider biofilm repressed	1.27234e-05		1.5153e-05	2.78798e-05	3	1.85854e-05
Q5A330	orf19.6434	PEX19	Ortholog(s) have peroxisome membrane targeting sequence binding activity	2.60408e-05	2.13462e-05	7.15874e-06		3	1.81819e-05
Q5AG39	orf19.4340		Has domain(s) with predicted RNA 7-methylguanosine cap binding, mRNA binding activity	1.53534e-05	2.77417e-05	1.10621e-05		3	1.80524e-05
A0A1D8PNG6	orf19.4265	UAP1	UDP-N-acetylglucosamine pyrophosphorylase, catalyzes biosynthesis of UDP-N-acetylglucosamine from UTP and N-acetylglucosamine 1-phosphate; functional homolog of S. cerevisiae Qri1p; alkaline upregulated	1.39357e-05	2.42426e-05	1.57197e-05		3	1.7966e-05
G1UB61	orf19.5691	CDC11	Septin; cell and hyphal morphology, agar-invasive growth, full virulence and kidney tissue invasion in mouse, but not kidney colonization, immunogenicity; hyphal and cell-cycle-regulated phosphorylation; rat catheter biofilm repressed	9.79499e-06	3.90188e-05	4.98176e-06		3	1.79318e-05
A0A1D8PJR2	orf19.6947	GTT11	Glutathione S-transferase, localized to ER; induced in exponentially growing cells, under oxidative stress; induced by nitric oxide; Spider biofilm induced	5.11697e-06	1.67588e-05		2.83518e-05	3	1.67425e-05
A0A1D8PJ73	orf19.1710	ALI1	Putative NADH-ubiquinone oxidoreductase; in detergent-resistant membrane fraction (possible lipid raft component); predicted N-terminal acetylation; nitric oxide-repressed; plasma membrane-localized; protein decreases in stationary phase	1.28424e-05	1.82635e-05	1.8154e-05		3	1.642e-05
A0A1D8PFX6	orf19.7258	DDI1	Putative DNA damage inducible v-SNARE binding protein; macrophage/pseudohyphal-repressed	3.61875e-06	7.78656e-06		3.74575e-05	3	1.62876e-05
Q5AGV1	orf19.6587	GIR2	Ortholog of S. cerevisiae Gir2; transposon mutation affects filamentous growth	2.65467e-05	1.47012e-05	6.26616e-06		3	1.5838e-05
Q5ABD5	orf19.6035		Protein of unknown function; repressed by nitric oxide	1.50269e-05	1.8379e-05	1.41003e-05		3	1.58354e-05
A0A1D8PKB0	orf19.7357		Ortholog(s) have phosphopantothenate--cysteine ligase activity, role in acetyl-CoA biosynthetic process from pantothenate, coenzyme A biosynthetic process and CoA-synthesizing protein complex, cytoplasm, nucleus localization	1.76106e-05	2.43615e-05	4.06313e-06		3	1.53451e-05
Q5A893	orf19.3235	CAP01	Putative F-actin capping protein subunit alpha; possibly an essential gene, disruptants not obtained by UAU1 method	9.38373e-06	3.1653e-05	4.07256e-06		3	1.50364e-05
A0A1D8PE91	orf19.5104	LTP1	Putative protein phosphatase of the PTP family (tyrosine-specific), similar to S. cerevisiae Ltp1p	7.62586e-06	1.88022e-05	1.85007e-05		3	1.49762e-05
A0A1D8PKY7	orf19.5639	HIS4	Multifunctional enzyme that catalyzes three steps of histidine biosynthesis, with phosphoribosyl-AMP cyclohydrolase, phosphoribosyl-ATP diphosphatase, and histidinol dehydrogenase activities; required for wild-type adhesion to human calls	1.59659e-05	2.25247e-05	6.26939e-06		3	1.492e-05
A0A1D8PIN9	orf19.1769	PLP2	Ortholog(s) have G-protein beta/gamma-subunit complex binding, actin binding activity and role in positive regulation of transcription from RNA polymerase II promoter by pheromones, protein folding	1.35476e-05	1.88072e-05	1.19911e-05		3	1.4782e-05
Q5A340	orf19.6423	FBP26	Ortholog(s) have fructose-2,6-bisphosphate 2-phosphatase activity and role in glucose metabolic process	1.03898e-06	2.0349e-05		2.19199e-05	3	1.44359e-05
A0A1D8PRE9	orf19.5505	HIS7	Putative imidazole glycerol phosphate synthase; histidine biosynthesis; no human/murine homolog; transcription induced by histidine starvation; regulated by Gcn2p and Gcn4p; higher protein level in stationary phase	7.19559e-06	2.3516e-05	1.25958e-05		3	1.44358e-05
A0A1D8PGG5	orf19.1514		Ortholog(s) have enzyme binding, phosphatidylinositol-4-phosphate binding activity	8.083e-06	2.5969e-05	8.86176e-06		3	1.43046e-05
A0A1D8PR98	orf19.5147	LMO1	Protein involved together with Dck1p and Rac1p in invasive filamentous growth and cell wall integrity; acts upstream of MAP kinase Cek1p; has similarity to human ELMO1	4.25023e-06	3.7182e-05	1.17522e-06		3	1.42025e-05
A0A1D8PMD0	orf19.1249	HIS6	Ortholog(s) have 1-(5-phosphoribosyl)-5-[(5-phosphoribosylamino)methylideneamino]imidazole-4-carboxamide isomerase activity and role in histidine biosynthetic process	4.63214e-06	1.16278e-05		2.57173e-05	3	1.39924e-05
Q5AMM4	orf19.7561	DEF1	RNA polymerase II regulator; role in filamentation, epithelial cell escape, dissemination in RHE model; induced by fluconazole, high cell density; Efg1/hyphal regulated; role in adhesion, hyphal growth on solid media; Spider biofilm induced	9.40274e-06	1.62463e-05		1.62004e-05	3	1.39498e-05
Q59WJ7	orf19.2304		Protein similar to S. cerevisiae Gvp36p; transposon mutation affects filamentous growth	8.91915e-06	1.01475e-05	2.10008e-05		3	1.33558e-05
Q59ST6	orf19.6933	RRD2	Ortholog(s) have peptidyl-prolyl cis-trans isomerase activity, protein phosphatase regulator activity, role in mitotic spindle organization, response to osmotic stress and protein phosphatase type 2A complex localization	8.43887e-06	2.71828e-05	4.27008e-06		3	1.32973e-05
A0A1D8PHE5	orf19.6867		Protein with a predicted cytochrome b5-like heme/steroid binding domain; repressed by alpha pheromone in SpiderM medium	4.94668e-06	2.26309e-05	1.2172e-05		3	1.32499e-05
Q59TB4	orf19.4517		Protein of unknown function; Hap43-induced gene	1.1495e-05	2.20526e-05	4.70036e-06		3	1.27493e-05
A0A1D8PSP7	orf19.514	SNP3	Putative U6 snRNA-associated protein; transcript regulated by Mig1	1.06456e-05	2.13049e-05	5.753e-06		3	1.25678e-05
Q59ZY9	orf19.4399	NCS2	Putative cytosolic thiouridylase subunit; Spider biofilm induced	1.46532e-05	1.94563e-05	2.976e-06		3	1.23618e-05
A0A1D8PNX8	orf19.3914		Has domain(s) with predicted translation initiation factor activity, role in translational initiation and cytoplasm localization	1.17273e-05	1.80325e-05	7.02921e-06		3	1.2263e-05
Q5AI07	orf19.3045	ALD4	Predicted aldehyde dehydrogenase domain; virulence-group-correlated expression	1.38154e-05	2.03406e-05	2.22827e-06		3	1.21281e-05
A0A1D8PIW1	orf19.5450	ETR1	Putative 2-enoyl thioester reductase; protein present in exponential and stationary growth phase yeast cultures; rat catheter biofilm repressed	9.50153e-06	2.26528e-05	2.9837e-06		3	1.17127e-05
A0A1D8PKI3	orf19.7437	MAA1	Putative protein of unknown function; Hap43p-repressed gene; ortholog of S. cerevisiae YJL218W	8.43432e-06	1.87465e-05	5.44306e-06		3	1.08746e-05
A0A1D8PJ75	orf19.1699	BZZ1	Protein similar to S. cerevisiae Bzz1p, which is an SH3 domain protein involved in the regulation of actin polymerization	8.24171e-06	1.53435e-05	7.45478e-06		3	1.03467e-05
A0A1D8PGA6	orf19.1993	RPN9	Ortholog(s) have structural molecule activity, role in proteasome assembly, ubiquitin-dependent protein catabolic process and cytosol, nucleus, proteasome regulatory particle, lid subcomplex, proteasome storage granule localization	5.84566e-06	2.18208e-05	3.12762e-06		3	1.02647e-05
Q00310	orf19.1665	MNT1	Alpha-1,2-mannosyl transferase; predicted type II Golgi membrane protein; adds 2nd mannose during cell-wall mannoprotein biosynthesis; required for wild-type virulence and adherence to epithelial cells; Hap43-induced	2.99723e-06	2.26637e-05	4.26834e-06		3	9.97644e-06
A0A1D8PSF5	orf19.2385	KTI12	Protein similar to S. cerevisiae Kti12p, which associates with Elongator complex; has a role in resistance to killer toxin; predicted Kex2p substrate; Hap43p-induced gene	5.94693e-06	1.93653e-05	3.58967e-06		3	9.63395e-06
Q59KQ1	orf19.558	GUT1	Putative glycerol kinase; downregulated upon adherence to polystyrene; greater mRNA abundance observed in a cyr1 homozygous null mutant than in wild type	6.70083e-06	1.84869e-05	3.23829e-06		3	9.47534e-06
A0A1D8PTM0	orf19.6287	AAT21	Putative aspartate aminotransferase; stationary phase enriched protein; Gcn4-regulated; Spider biofilm induced	5.71133e-06	9.60887e-06		1.27748e-05	3	9.36499e-06
A0A1D8PLD8	orf19.4626	TAP42	Ortholog(s) have role in TOR signaling, positive regulation of transcription by RNA polymerase I and cytosol, extrinsic component of membrane localization	8.29214e-06	1.20366e-05	7.24385e-06		3	9.19086e-06
Q5A7S3	orf19.5393		Putative cysteine sulfinate decarboxylase; transcript positively regulated by Tbf1; Spider biofilm induced	5.81136e-06	1.85459e-05	3.05665e-06		3	9.13797e-06
Q5AI37	orf19.3015	ARX1	Putative ribosomal large subunit biogenesis protein; repressed in core stress response; repressed by prostaglandins	2.69575e-06	1.92675e-05	2.3076e-06		3	8.09027e-06
A0A1D8PND7	orf19.4228		Protein with a role in insertion of tail-anchored proteins into the ER membrane; Spider biofilm repressed	3.72088e-06	8.52988e-06	1.19715e-05		3	8.07409e-06
A0A1D8PRI0	orf19.1857	SPT1	Putative L-azetidine-2-carboxylic acid acetyltransferase; mutants are viable	4.56063e-06	9.10731e-06		1.03696e-05	3	8.01251e-06
Q59TD5	orf19.4495	NDH51	Nicotinamide adenine dinucleotide dehydrogenase complex I subunit of the mitochondrial electron transport chain; required for wild-type filamentous growth; alkaline repressed; Hap43-repressed; Spider biofilm repressed	1.35525e-05	6.35682e-06	3.75369e-06		3	7.88768e-06
Q5AJ92	orf19.1701	RKI1	Ortholog(s) have ribose-5-phosphate isomerase activity and role in pentose-phosphate shunt, pyridoxine biosynthetic process	5.17649e-06	1.19793e-05	6.32299e-06		3	7.82625e-06
A0A1D8PDW6	orf19.6225	PCL7	Putative cyclin-like protein; possible Pho85 cyclin; hyphal repressed; induced by Mnl1 under weak acid stress	5.61875e-06	1.219e-05	5.04826e-06		3	7.61901e-06
A0A1D8PE53	orf19.5058	SMI1	Cell wall biosynthesis protein; Hap43, caspofungin-repressed; Cyr1-induced in hyphal cells; reduced biofilm cell wall glucan in mutant; possibly essential (UAU1 method); flow model biofilm induced	5.8064e-06	7.18284e-06	9.5114e-06		3	7.50021e-06
A0A1D8PJL8	orf19.317	PNP1	Purine nucleoside phosphorylase; metabolizes inosine and guanosine nucleosides; in the nicotinamide riboside salvage pathway; Spider biofilm repressed	4.37629e-06	1.1036e-05		6.90152e-06	3	7.43794e-06
Q59VX8	orf19.3680	SEP7	Septin, required for wild-type invasive growth in vitro but not required for virulence in a mouse model of systemic infection; localizes to hyphal septum or bud neck; Asn-rich; aberrant gel mobility; phosphorylated in vitro by Gin4p	5.83533e-06	1.39771e-05	2.0842e-06		3	7.29887e-06
A0A1D8PGT0	orf19.5783		Ortholog(s) have protein-arginine omega-N monomethyltransferase activity and role in peptidyl-arginine methylation	6.03993e-06	1.04569e-05	4.98722e-06		3	7.16134e-06
A0A1D8PS03	orf19.2546	TRP2	Putative anthranilate synthase with a predicted role in tryptophan biosynthesis; regulated by Gcn2p and Gcn4p	9.8078e-06	5.57776e-06		5.91837e-06	3	7.10131e-06
A0A1D8PS11	orf19.2555	URA5	Putative orotate phosphoribosyltransferase; protein abundance is affected by URA3 expression in the CAI-4 strain background; flucytosine induced; protein level decreased in stationary phase cultures	5.50632e-06	1.00843e-05	5.37681e-06		3	6.98914e-06
Q5AMQ5	orf19.4591	CAT2	Major carnitine acetyl transferase; intracellular acetyl-CoA transport; localized in peroxisomes and mitochondria; induced in macrophages; Hog1-repressed; stationary phase enriched; farnesol-upregulated in biofilm; Spider biofilm induced	1.20757e-05	4.61662e-06	3.42961e-06		3	6.70732e-06
Q5A0Z0	orf19.3106	MET16	Putative 3'-phosphoadenylsulfate reductase; sulfur amino acid metabolism; reports differ on regulation during biofilm formation; fungal-specific; possibly an essential gene, disruptants not obtained by UAU1 method; Hap43p-repressed gene	7.16624e-06	6.19388e-06	4.84354e-06		3	6.06789e-06
Q5AH07	orf19.6531	NUC2	Putative NADH-ubiquinone oxidoreductase; identified in detergent-resistant membrane fraction (possible lipid raft component); alkaline repressed; Hap43-repressed; Spider biofilm repressed	8.66661e-06	4.17896e-06	4.34552e-06		3	5.73036e-06
Q5AH29	orf19.6509	TTR12	Ortholog(s) have glutathione disulfide oxidoreductase activity and cytosol localization	3.81334e-06	8.0553e-06	5.08449e-06		3	5.65104e-06
A0A1D8PTV0	orf19.7286	RPN7	Subunit of the proteasome regulatory particle; regulated by Gcn2p and Gcn4p; protein present in exponential and stationary growth phase yeast cultures	4.43829e-06	8.48773e-06	3.7259e-06		3	5.55064e-06
A0A1D8PDV1	orf19.6245		Protein of unknown function; regulated by osmotic stress via Hog1 and oxidative stress (Hog1- and Cap1-independent); induced by alpha pheromone in SpiderM medium; Spider biofilm induced	4.1469e-06	1.0102e-05	1.99968e-06		3	5.41619e-06
A0A1D8PKE2	orf19.7388	PBS2	MAPK kinase (MAPKK); role in osmotic and oxidative stress responses, oxidative stress adaptation; required for stress regulation of Hog1p localization and activity; functional homolog of S. cerevisiae Pbs2p	4.17376e-06	9.63837e-06	1.04072e-06		3	4.95095e-06
Q5A6L1	orf19.543	FUM11	Fumarate hydratase; induced in high iron; protein in exponential and stationary-phase yeast cells, but higher in stationary phase; rat catheter biofilm repressed	3.63842e-06	8.02032e-06	2.35624e-06		3	4.67166e-06
A0A1D8PDB1	orf19.6843		Ortholog(s) have role in CENP-A containing nucleosome assembly, chromatin maintenance and nucleoplasm localization	2.36617e-06	9.81792e-06	1.37579e-06		3	4.51996e-06
Q5ADL9	orf19.6822		Ortholog(s) have NEDD8 transferase activity, cullin family protein binding, protein binding, bridging, ubiquitin conjugating enzyme binding, ubiquitin-like protein binding activity	3.34062e-06	8.31788e-06	1.61741e-06		3	4.4253e-06
Q5AEC3	orf19.345	UGA2	Succinate semialdehyde dehydrogenase; for utilization of gamma-aminobutyrate (GABA) as a nitrogen source; part of 4-aminobutyrate and glutamate degradation pathways; rat catheter biofilm induced	4.13615e-06	5.3419e-06	3.56212e-06		3	4.34673e-06
Q5AL34	orf19.4943	PSA2	Mannose-1-phosphate guanyltransferase; Hap43, macrophage-repressed; stationary phase enriched protein; Spider biofilm induced; rat catheter biofilm repressed	3.25634e-06	7.31484e-06	1.49708e-06		3	4.02276e-06
A0A1D8PGI9	orf19.1516	UBP14	Ortholog(s) have thiol-dependent ubiquitin-specific protease activity and role in negative regulation of gluconeogenesis, proteasome-mediated ubiquitin-dependent protein catabolic process	6.88931e-06	4.09542e-06	1.00725e-06		3	3.99733e-06
A0A1D8PGA2	orf19.2005	REG1	Putative protein phosphatase regulatory subunit; Hap43-repressed gene; macrophage/pseudohyphal-induced; possibly regulated upon hyphal formation; flow model biofilm induced	5.25337e-06		2.15484e-06	4.33499e-06	3	3.9144e-06
A0A1D8PCN0	orf19.3672	GAL10	UDP-glucose 4-epimerase; galactose utilization; mutant has cell wall defects and increased filamentation; GlcNAc-, fluconazole- and ketoconazole-induced; stationary phase enriched protein; rat catheter and flow model biofilm induced	1.2339e-06	5.67167e-06	4.52691e-06		3	3.81083e-06
Q5AKW4	orf19.5013	AGM1	Phosphoacetylglucosamine mutase (N-acetylglucosamine-phosphate mutase); enzyme of UDP-N-acetylglucosamine (UDP-GlcNAc) biosynthesis	4.70902e-06	4.42746e-06	1.99675e-06		3	3.71108e-06
O74711	orf19.5640	PEX5	Pex5p family protein; required for PTS1-mediated peroxisomal protein import, fatty acid beta-oxidation; similar to S. cerevisiae Pas10p peroxisomal targeting receptor; macrophage/pseudohyphal-repressed; Hap43p-repressed	6.72894e-06	3.05462e-06	9.60917e-07		3	3.58149e-06
A0A1D8PH56	orf19.4516	MET7	Ortholog(s) have tetrahydrofolylpolyglutamate synthase activity, role in one-carbon metabolic process, regulation of DNA methylation and cytoplasm, mitochondrion localization	1.81549e-06	5.31274e-06	2.52711e-06		3	3.21845e-06
A0A1D8PQJ7	orf19.7086	KAP114	Ortholog(s) have role in protein import into nucleus and cytoplasm, nucleus localization	2.41366e-06	4.22633e-06	8.42999e-07		3	2.49433e-06
Q5A868	orf19.3260	CAB3	Putative phosphopantothenoylcysteine decarboxylase, binds to protein phosphatase Ppz1p and regulates its activity	1.37741e-06	4.19093e-06	1.70915e-06		3	2.42583e-06
A0A1D8PU75	orf19.7610	PTP3	Putative protein tyrosine phosphatase; hypha induced; alkaline induced; regulated by Efg1, Ras1, cAMP pathways; mutants are viable; Spider biofilm induced; rat catheter biofilm repressed; flow model biofilm repressed	1.34777e-06	2.715e-06	1.04752e-06		3	1.70343e-06
Q59MZ5	orf19.6317	ADE6	5-Phosphoribosylformyl glycinamidine synthetase; adenine biosynthesis; not induced in GCN response, in contrast to S. cerevisiae Ade6; protein in stationary phase yeast-form cultures; flow model and rat catheter biofilm repressed	1.22241e-06	1.30051e-06	5.82992e-07		3	1.03531e-06
Q5ALN5	orf19.1542	HEX3	Protein similar to S. cerevisiae Hex3p, which is involved in DNA damage response; transposon mutation affects filamentous growth	0.00234901	1.4004e-05			2	0.00118151
A0A1D8PJP6	orf19.330.1	RUB1	Ubiquitin-related protein with similarity to mammalian NEDD8; reversible conjugation (neddylation) of the cullin subunit (Cdc53p) modulates the ubiquitin ligase activity of the SCF complexes		0.000326587		0.000774545	2	0.000550566
Q5A4M2	orf19.3419	MAE1	Malic enzyme, mitochondrial; transcription regulated by Mig1, Tup1; colony morphology-related gene regulation by Ssn6; Hap43-repressed; Spider biofilm repressed		6.50072e-06	0.000614209		2	0.000310355
Q5APH1	orf19.4793		Putative ribosome-associated protein; ortholog of S. cerevisiae Tma16; Hap43-induced gene; Spider biofilm induced		0.000258729	0.000105439		2	0.000182084
A0A1D8PPC9	orf19.4215	FET34	Multicopper ferroxidase; induced by low iron, ciclopirox olamine, ketoconazole, hypoxia; alkaline induced by Rim101; repressed in fluconazole-resistant isolate; Sfu1, Hog1 repressed; complements S. cerevisiae fet3; Spider biofilm induced		6.15763e-05		0.000298085	2	0.000179831
Q5A6L5	orf19.539	LAP3	Putative aminopeptidase; positively regulated by Sfu1; clade-associated gene expression; virulence-group-correlated expression; induced by alpha pheromone in SpiderM medium; Hap43-induced; Spider and flow model biofilm induced		0.000112493		0.000150716	2	0.000131604
A0A1D8PLM8	orf19.2723	HIT1	Ortholog of S. cerevisiae Hit1; protein of unknown function required for high temperature growth; flow model biofilm induced; Spider biofilm induced	4.42754e-05		0.000151279		2	9.77773e-05
P87219	orf19.2896	SOU1	Enzyme involved in utilization of L-sorbose; has sorbitol dehydrogenase, fructose reductase, and sorbose reductase activities; NAD-binding site motif; transcriptional regulation affected by chromosome 5 copy number; Hap43p-induced gene		7.27194e-05		0.000108935	2	9.08272e-05
A0A1D8PM41	orf19.1409	VAC7	Ortholog of S. cerevisiae Vac7; integral vacuolar membrane protein involved in vacuole inheritance and morphology; mutants are viable		0.000107536	3.78024e-05		2	7.26692e-05
A0A1D8PIS1	orf19.5342.2		Protein of unknown function; protein newly produced during adaptation to the serum		0.000103355	3.2038e-05		2	6.76965e-05
A0A1D8PQS1	orf19.6898		Protein similar to S. pombe SPBC1709.16c a predicted aromatic ring-opening dioxygenase; induced by benomyl treatment or in azole-resistant strain that overexpresses MDR1; Spider biofilm induced		2.69308e-05		0.000101143	2	6.40368e-05
Q59T91	orf19.4540	UBC8	Predicted ubiquitin-conjugating enzyme that negatively regulates gluconeogenesis by mediating the glucose-induced ubiquitination of fructose-1,6-bisphosphatase; induced by alpha pheromone in SpiderM medium	2.9306e-05	9.36863e-05			2	6.14961e-05
Q5ADV2	orf19.6739		Ortholog(s) have phosphopentomutase activity and role in guanosine catabolic process, inosine catabolic process, purine ribonucleoside salvage	0.000106609	8.20821e-06			2	5.74086e-05
A0A1D8PD02	orf19.3016		Ortholog of C. dubliniensis CD36 : Cd36_03040, C. parapsilosis CDC317 : CPAR2_108610, Debaryomyces hansenii CBS767 : DEHA2G16500g and Pichia stipitis Pignal : PICST_32835	2.62268e-05	8.71786e-05			2	5.67027e-05
A0A1D8PR50	orf19.6458.1		Ortholog(s) have U6 snRNA binding activity, role in cytoplasmic mRNA processing body assembly and Lsm1-7-Pat1 complex, P-body, U4/U6 x U5 tri-snRNP complex, U6 snRNP, nucleolus localization		3.53486e-05		7.37685e-05	2	5.45585e-05
Q5AKU5	orf19.5032	SIM1	Adhesin-like protein; involved in cell wall maintenance, redundant with Sun41; possibly secreted; macrophage-repressed; repressed by Rim101, Cyr1, Ras1; Spider biofilm induced	5.07233e-05		3.51547e-05		2	4.2939e-05
Q5AHH7	orf19.819	ACP12	Putative mitochondrial acyl carrier protein	1.37522e-05		6.78329e-05		2	4.07926e-05
A0A1D8PD97	orf19.5201.1		Has domain(s) with predicted ATPase inhibitor activity, role in negative regulation of ATPase activity, negative regulation of nucleotide metabolic process and mitochondrion localization	2.89716e-05	4.80882e-05			2	3.85299e-05
Q59XX2	orf19.1779	MP65	Cell surface mannoprotein; cell-wall glucan metabolism, adhesion; adhesin motif; O-glycosylation; induced by heat, germ tube formation, wall regeneration; mycelial antigen; diagnostic marker; fluconazole-repressed; Spider biofilm induced		1.49077e-05		5.98048e-05	2	3.73563e-05
A0A1D8PF19	orf19.681	HAP43	CCAAT-binding factor-dependent transcription factor; repressor; also called CAP2; required for low iron response; similar to bZIP transcription factor AP-1; repressed by Sfu1; ciclopirox olamine induced; rat catheter, Spider biofilm induced		4.71188e-05		2.26449e-05	2	3.48818e-05
A0A1D8PLD7	orf19.4609		Putative dienelactone hydrolase; protein abundance is affected by URA3 expression in the CAI-4 strain background; protein present in exponential and stationary growth phase yeast cultures; rat catheter biofilm repressed	7.4349e-06	6.07814e-05			2	3.41082e-05
A0A1D8PPB0	orf19.1190	STV1	Predicted subunit a of vacuolar proton-translocating ATPase V0 domain, Golgi isoform	6.07217e-05			7.45158e-06	2	3.40866e-05
Q5A1Y2	orf19.2862	RIB1	Putative GTP cyclohydrolase II; enzyme of riboflavin biosynthesis; fungal-specific (no human or murine homolog); regulated by Sef1p-, Sfu1p-, and Hap43p	1.05551e-05	5.70985e-05			2	3.38268e-05
Q5AG73	orf19.4306		Ortholog(s) have methylthioribulose 1-phosphate dehydratase activity and role in L-methionine salvage from methylthioadenosine		5.18174e-06		6.24564e-05	2	3.38191e-05
A0A1D8PNP9	orf19.2639.1		Lsm (Like Sm) protein; predicted role in involved in mRNA decay; Spider biofilm repressed		3.5024e-05	3.03556e-05		2	3.26898e-05
A0A1D8PFV0	orf19.7219	FTR1	High-affinity iron permease; required for mouse virulence, low-iron growth; iron, amphotericin B, caspofungin, ciclopirox, Hog1p, Sef1p, Sfu1p, and Hap43p regulated; complements S. cerevisiae ftr1 iron transport; Hap43p-repressed		2.6178e-05		3.91302e-05	2	3.26541e-05
Q5A7P7	orf19.5419	ATP5	Putative F0-ATP synthase FO subunit B; caspofungin repressed; protein level decreased in stationary phase yeast cultures; Spider biofilm repressed		5.70825e-05	6.81481e-06		2	3.19487e-05
O74201	orf19.7195	RAD6	Functional ortholog of S. cerevisiae Rad6; negative regulator of hyphal growth; required for wild-type UV resistance; acts in pathway with Efg1; ; transcript is UV-induced, slightly repressed during hyphal growth; gene has two introns	2.43035e-05	3.67243e-05			2	3.05139e-05
A0A1D8PNP4	orf19.6658		Stationary phase enriched protein; predicted ORF from Assembly 19; removed from Assembly 20; subsequently reinstated in Assembly 21 based on comparative genome analysis	9.89502e-06	5.02428e-05			2	3.00689e-05
Q5ALK3	orf19.1575	PRS1	Phosphoribosylpyrophosphate synthetase; enzyme of purine, pyrimidine, histidine, and tryptophan biosynthesis; essential; flucytosine induced; macrophage/pseudohyphal-induced	6.09407e-06	5.35843e-05			2	2.98392e-05
Q59WT0	orf19.121	ARC18	Putative ARP2/3 complex subunit; mutation confers hypersensitivity to cytochalasin D	1.35753e-05	4.14297e-05			2	2.75025e-05
A0A1D8PI64	orf19.3617	GTR1	Putative GTP-binding protein; involved in activation of TOR1C during starvation response; transcript is upregulated in clinical isolates from HIV+ patients with oral candidiasis; (see Locus History Note for Assembly 19 correction)	5.73489e-06	4.86909e-05			2	2.72129e-05
A0A1D8PNB1	orf19.3183		Protein with a role in insertion of tail-anchored proteins into the ER membrane; required for efficient mating, in shmoo formation and nuclear migration in the pre-zygote of S. cerevisiae; Hap43-repressed	2.56369e-05	2.79895e-05			2	2.68132e-05
Q5AFB4	orf19.2693	GST2	Glutathione S transferase; induced by benomyl and in populations of cells exposed to fluconazole over multiple generations; regulated by Nrg1, Tup1; induced by nitric oxide; stationary phase enriched; Spider biofilm induced	6.11805e-06	4.73379e-05			2	2.6728e-05
A0A1D8PLC6	orf19.4624	HRT2	Protein described as having a role in Ty3 transposition; repressed in hyphae; stationary phase enriched protein; rat catheter and Spider biofilm repressed		4.42451e-05	7.91037e-06		2	2.60778e-05
Q5AJ71	orf19.1721	NCE103	Carbonic anhydrase; converts of CO2 to bicarbonate; essential for virulence in host niches with limited CO2, normal white-opaque switch; Mnl1-induced in weak acid stress; Hap43-induced gene; F-12/CO2, rat catheter, Spider biofilm induced	1.18182e-05	3.95549e-05			2	2.56866e-05
A0A1D8PJF0	orf19.1632		Has domain(s) with predicted catalytic activity		1.76439e-05		3.32371e-05	2	2.54405e-05
A0A1D8PS50	orf19.2614	RSR1	RAS-related protein; GTP/GDP cycling required for wild-type polar bud site selection, hyphal growth guidance; role in systemic virulence in mouse; geranylgeranylation predicted; suppresses S. cerevisiae cdc24-4 mutant heat sensitivity		7.35817e-06		3.82152e-05	2	2.27867e-05
Q5ALX7	orf19.1449		Protein of unknown function; induced in azole-resistant strain that overexpresses MDR1; protein present in exponential and stationary growth phase yeast cultures; Spider biofilm induced	1.68744e-05	2.85897e-05			2	2.27321e-05
A0A1D8PQP1	orf19.7036	WHI2	Ortholog(s) have protein phosphatase binding activity	1.3014e-05	3.04552e-05			2	2.17346e-05
A0A1D8PRU4	orf19.3251	ARC19	Putative ARP2/3 complex subunit; Hap43-induced gene; mutation confers hypersensitivity to cytochalasin D; rat catheter biofilm repressed	1.49859e-05	2.79432e-05			2	2.14646e-05
Q92207	orf19.895	HOG1	MAP kinase of osmotic-, heavy metal-, and core stress response; role in regulation of response to stress; phosphorylated in response to H2O2 or NaCl; acts as repressor of START; mutant induces protective mouse immune response		3.6398e-05	4.40706e-06		2	2.04026e-05
A0A1D8PD74	orf19.4476	IFD1	Protein with a NADP-dependent oxidoreductase domain; transcript induced by ketoconazole; rat catheter and Spider biofilm induced		3.24994e-05		7.77885e-06	2	2.01391e-05
Q5ABA5	orf19.6065		RNA polymerase II holoenzyme/mediator subunit; regulated by Mig1, Tup1; amphotericin B, caspofungin repressed; protein present in exponential and stationary growth phase yeast; Hap43-repressed; Spider biofilm repressed	1.03261e-05	2.95111e-05			2	1.99186e-05
Q5AA47	orf19.2437	ARC35	Putative ARP2/3 complex subunit; shows colony morphology-related gene regulation by Ssn6p; mutation confers hypersensitivity to cytochalasin D	1.36749e-05	2.47947e-05			2	1.92348e-05
Q5A6L0	orf19.544	RPR2	Ortholog(s) have ribonuclease P activity, role in intronic box C/D snoRNA processing, tRNA processing and nucleolar ribonuclease P complex localization	1.01153e-05	2.79794e-05			2	1.90474e-05
A0A1D8PSA3	orf19.2828	ALF1	Ortholog(s) have alpha-tubulin binding, microtubule binding activity and role in cytoplasmic microtubule organization, establishment or maintenance of cell polarity, post-chaperonin tubulin folding pathway, protein folding	8.85261e-06	2.91511e-05			2	1.90019e-05
Q5A199	orf19.2920		Ortholog(s) have role in ribosome biogenesis and cytosol localization	1.04414e-05	2.57953e-05			2	1.81184e-05
A0A1D8PIS4	orf19.5348	TPS3	Predicted trehalose-phosphate synthase regulatory subunit; regulated by Efg1; regulated by Tsa1, Tsa1B under H2O2 stress conditions; flow model biofilm induced (reports differ)		1.11422e-05		2.39124e-05	2	1.75273e-05
A0A1D8PCP4	orf19.3684	SPS19	Putative oxidoreductase; Spider biofilm induced	1.0231e-05	2.07595e-05			2	1.54953e-05
Q5A5Q4	orf19.5345	DSK2	Putative ubiquitin-like polyubiquitin-binding protein; induced by nitric oxide independent of Yhb1; Spider biofilm repressed	1.92511e-05		1.14698e-05		2	1.53604e-05
A0A1D8PLS0	orf19.2671		Protein with a predicted FAD-dependent pyridine nucleotide reductase domains; putative oxidoreductase; Plc1-regulated; possibly an essential gene, disruptants not obtained by UAU1 method		9.97134e-06		2.01269e-05	2	1.50491e-05
Q5AHF9	orf19.837	GNA1	Glucosamine-6-phosphate acetyltransferase; enzyme of UDP-GlcNAc biosynthesis; required for viability in absence of GlcNAc supplementation; required for persistent infection and wild-type virulence in mouse systemic infection	1.14446e-05	1.86437e-05			2	1.50441e-05
Q5ANE3	orf19.5960	NCE102	Non classical protein export protein; localized to plasma membrane; Hap43-induced gene; flow model biofilm induced; Spider biofilm induced	2.05952e-05		9.36549e-06		2	1.49803e-05
A0A1D8PQI8	orf19.7098		Putative protein of unknown function; Hap43-repressed; repressed by nitric oxide; Spider biofilm induced	1.59354e-05	1.3387e-05			2	1.46612e-05
Q5A9E7	orf19.2518	SEC17	Ortholog(s) have ATPase activator activity, soluble NSF attachment protein activity and role in SNARE complex disassembly, autophagy, vacuole fusion, non-autophagic, vesicle fusion with Golgi apparatus	6.18418e-06	2.23923e-05			2	1.42882e-05
A0A1D8PRN2	orf19.7499		Putative nicotinic acid mononucleotide adenylyltransferase, involved in NAD salvage pathway; Spider biofilm repressed	4.63958e-06	2.26039e-05			2	1.36217e-05
A0A1D8PRB0	orf19.1340		Putative aldose reductase; protein level decreases in stationary phase cultures; Spider biofilm repressed	3.00645e-06	2.40395e-05			2	1.35229e-05
Q5A220	orf19.2823	RFG1	HMG domain transcriptional repressor of filamentous growth and hyphal genes; in Tup1-dependent and -independent pathways; binds DNA; transcript not regulated by oxygen or serum; not responsible for hypoxic repression; Spider biofilm induced	6.76862e-06	2.00776e-05			2	1.34231e-05
Q59WG6	orf19.2335		Putative aspartyl aminopeptidase; stationary phase enriched protein; mutation confers hypersensitivity to 5-fluorouracil (5-FU); Hog1-induced; planktonic growth-induced; rat catheter and Spider biofilm repressed	9.06216e-06	1.77577e-05			2	1.34099e-05
Q5A359	orf19.6404	GSH2	Putative glutathione synthase; induced in high iron; heavy metal (cadmium) stress-induced	5.77044e-06	1.9882e-05			2	1.28262e-05
Q5AGY4	orf19.6554		Regulator of calcineurin; regulated by calcineurin-Crz1 pathway; feedback regulator of calcineurin-dependent signaling; Hap43-repressed; induced by ketoconazole, hypoxia, during growth in the mouse cecum; Spider biofilm induced	5.61668e-06	1.97985e-05			2	1.27076e-05
Q5AP95	orf19.4869	SFU1	GATA-type transcription factor; regulator of iron-responsive genes; represses iron utilization genes if iron is present; Hap43-repressed; promotes gastrointestinal commensalism in mice; Spider biofilm induced		6.39155e-06		1.82627e-05	2	1.23271e-05
A0A1D8PTY4	orf19.7332	ELF1	Putative mRNA export protein; Walker A and B (ATP/GTP binding) motifs; required for wild-type morphology, growth; expressed in hyphal, pseudohyphal, and yeast form; Hap43-induced; Spider and flow model biofilm induced		1.94512e-05		4.05855e-06	2	1.17549e-05
Q5A0J5	orf19.5816	EBP7	Putative NADPH oxidoreductase; mutation confers hypersensitivity to toxic ergosterol analog; oxidative stress-induced via Cap1p		1.47872e-05		8.65083e-06	2	1.1719e-05
Q59P03	orf19.1801	CBR1	Putative cytochrome B5 reductase; plasma membrane-localized		1.05521e-05	1.2438e-05		2	1.14951e-05
A0A1D8PTU7	orf19.7284	ASR2	Adenylyl cyclase and stress responsive protein; induced in cyr1 or ras1 mutant; stationary phase enriched protein; Spider biofilm induced		5.52794e-06		1.65833e-05	2	1.10556e-05
A0A1D8PGS7	orf19.5789	ADE8	Putative phosphoribosylglycinamide formyl-transferase, enzyme of amino acid biosynthesis pathway; upregulated in biofilm; S. cerevisiae ortholog is Gcn4p regulated; protein enriched in stationary phase yeast-form cultures		1.70303e-05	5.07333e-06		2	1.10518e-05
Q59SJ2	orf19.4180	SEC72	ER protein-translocation complex component; regulated by Gcn4p; repressed in response to amino acid starvation (3-aminotriazole treatment); sumoylation target		1.61915e-05	5.73091e-06		2	1.09612e-05
A0A1D8PSI3	orf19.4395	AIP1	Putative actin cytoskeleton component; protein present in exponential and stationary growth phase yeast cultures	1.96189e-06	1.88485e-05			2	1.04052e-05
Q5A692	orf19.3798	TRM8	Ortholog(s) have tRNA (guanine-N7-)-methyltransferase activity, role in tRNA (guanine-N7)-methylation and tRNA (m7G46) methyltransferase complex localization	6.72894e-06	1.3548e-05			2	1.01385e-05
Q5ADT4	orf19.6757	GCY1	Aldo/keto reductase; mutation confers hypersensitivity to toxic ergosterol analog; farnesol-repressed; stationary phase enriched protein; flow model biofilm induced; Spider biofilm repressed	1.01724e-05	9.68052e-06			2	9.92644e-06
A0A1D8PQ57	orf19.5630	APA2	Putative ATP adenylyltransferase II; regulated by Gcn4; repressed by amino acid starvation (3-AT); induced by prostaglandins; Hap43-repressed; Spider biofilm repressed		1.09306e-05	8.51187e-06		2	9.72125e-06
A0A1D8PJ76	orf19.1697		Ortholog(s) have role in cytoplasmic translation, poly(A)+ mRNA export from nucleus and cytoplasm localization	3.05853e-06	1.51749e-05			2	9.11672e-06
Q59X24	orf19.4107	PPX1	Exopolyphosphatase, hydrolyzes inorganic polyphosphate (poly P) into Pi residues; Spider biofilm repressed	2.58969e-06	1.54624e-05			2	9.02603e-06
A0A1D8PH46	orf19.792	RIM11	Ortholog of S. cerevisiae Rim11; a protein kinase involved in meiosis and sporulation in S. cerevisiae; mutant is viable	8.01397e-06	9.62573e-06			2	8.81985e-06
A0A1D8PP94	orf19.6324	VID27	Protein similar to S. cerevisiae Vid27p; transposon mutation affects filamentous growth; mutation confers hypersensitivity to toxic ergosterol analog; fungal-specific (no human or murine homolog)	2.47103e-06	1.50679e-05			2	8.76944e-06
Q5AK43	orf19.3977		Protein with a role in translation; flow model biofilm repressed	4.91733e-06	1.17618e-05			2	8.33956e-06
A0A1D8PQ75	orf19.5730		Putative phenylacrylic acid decarboxylase; clade-associated gene expression	5.52368e-06	1.09104e-05			2	8.21704e-06
Q59YF2	orf19.1374		Ortholog of C. dubliniensis CD36 : Cd36_23840, Candida tenuis NRRL Y-1498 : CANTEDRAFT_104074, Debaryomyces hansenii CBS767 : DEHA2B13310g and Pichia stipitis Pignal : PICST_58235	4.49533e-06	1.17643e-05			2	8.12982e-06
Q5A477	orf19.1232	VRG4	GDP-mannose transporter; essential; required for glycosylation, hyphal growth; functional homolog of S. cerevisiae Vrg4p, which imports GDP-mannose from cytoplasm to Golgi for protein and lipid mannosylation; no mammalian homolog	3.41328e-06	1.20678e-05			2	7.74053e-06
Q59VX1	orf19.3687	PFD1	Ortholog(s) have unfolded protein binding activity, role in cytoskeleton organization, positive regulation of transcription elongation from RNA polymerase II promoter, protein folding and prefoldin complex localization	8.38142e-06		6.86369e-06		2	7.62256e-06
A0A1D8PQS6	orf19.6901	DCS1	Ortholog(s) have RNA 7-methylguanosine cap binding, exoribonuclease activator activity, hydrolase activity, acting on acid anhydrides, in phosphorus-containing anhydrides, m7G(5')pppN diphosphatase activity	3.99959e-06	1.09542e-05			2	7.47691e-06
Q5A8X9	orf19.3355	ISN1	Putative inosine 5'-monophosphate 5'-nucleotidase; fungal-specific (no human or murine homolog)	1.90973e-06	1.26882e-05			2	7.29896e-06
Q5AL17	orf19.4960	SPE4	Ortholog(s) have spermine synthase activity and role in pantothenate biosynthetic process, spermine biosynthetic process	7.28404e-06		7.16742e-06		2	7.22573e-06
P31225	orf19.7323	CBP1	Corticosteroid binding protein; transcription induced at late log-phase or upon adherence to polystyrene; not induced by corticosterone; contains a possible NAD/FAD binding region; regulated by Nrg1, Tup1; Spider biofilm induced	2.3784e-06	1.20619e-05			2	7.22014e-06
Q5A0H3	orf19.5838	SER2	Ortholog(s) have phosphoserine phosphatase activity and role in L-serine biosynthetic process	6.06845e-06	7.63559e-06			2	6.85202e-06
Q5AHE9	orf19.847	YIM1	Protein similar to protease of mitochondrial inner membrane; increased transcription is observed upon benomyl treatment; macrophage-downregulated gene			1.76796e-06	1.10056e-05	2	6.38676e-06
Q59SS1	orf19.6948	CCC1	Manganese transporter; required for normal filamentous growth; mRNA binds She3, localized to hyphal tips; repressed by NO, alkaline pH; colony morphology-related regulation by Ssn6; regulated by Sef1, Sfu1, Hap43; Spider biofilm induced	5.66421e-06		7.07933e-06		2	6.37177e-06
Q59MN2	orf19.744	GDB1	Putative glycogen debranching enzyme; expression is regulated upon white-opaque switch; regulated by Nrg1, Tup1; rat catheter biofilm repressed		1.00565e-05		2.46694e-06	2	6.26171e-06
A0A1D8PNB5	orf19.3174	CDC24	GDP-GTP exchange factor for Cdc42p; phosphorylated; required for maintenance of hyphal growth; misexpression blocks hyphal growth and causes avirulence in a mouse model of systemic infection; antigenic during human oral infection		5.4031e-06		7.04831e-06	2	6.22571e-06
A0A1D8PU06	orf19.6601.1	YKE2	Possible heterohexameric Gim/prefoldin protein complex subunit; role in folding alpha-tubulin, beta-tubulin, and actin; transcript induced by yeast-to-hypha switch; regulated by Nrg1, Tup1; Spider and flow model biofilm induced	5.07192e-06	7.3532e-06			2	6.21256e-06
A0A1D8PKD2	orf19.7383	HAL3	Putative phosphopantothenoylcysteine decarboxylase, binds to protein phosphatase Ppz1p and regulates its activity	3.07696e-06	9.25735e-06			2	6.16716e-06
A0A1D8PRL8	orf19.7522		Protein with a pyridoxal phosphate-dependent transferase domain; Hap43-repressed; mutation confers hypersensitivity to amphotericin B; Spider biofilm repressed		9.85754e-06	2.43597e-06		2	6.14675e-06
Q5AMR0	orf19.4587	HGH1	Putative HMG1/2-related protein; transcript regulated by Mig1	5.46416e-06	6.59159e-06			2	6.02788e-06
A0A1D8PQ60	orf19.5711	CSR1	Putative phosphatidylinositol transfer protein; possibly an essential gene, disruptants not obtained by UAU1 method	1.19042e-06	1.07325e-05			2	5.96147e-06
A0A1D8PSJ6	orf19.4381	VTC3	Putative polyphosphate synthetase; downregulated in core caspofungin response; Hog1p-induced; transcription is opaque-specific; fungal-specific (no human or murine homolog)	1.16153e-06	1.07443e-05			2	5.95293e-06
Q5A948	orf19.2618	MET2	Homoserine acetyltransferase; Hap43p-, Gcn4p-regulated; macrophage/pseudohyphal-repressed; not highly biofilm induced, in contrast to many sulfur amino acid metabolic genes; no human or murine homolog; virulence-group-correlated expression	7.98628e-06		3.57031e-06		2	5.77829e-06
A0A1D8PRF1	orf19.5504		Ortholog of C. dubliniensis CD36 : Cd36_73400, C. parapsilosis CDC317 : CPAR2_703180, Candida tenuis NRRL Y-1498 : CANTEDRAFT_104803 and Debaryomyces hansenii CBS767 : DEHA2A04466g		7.69139e-06		3.68141e-06	2	5.6864e-06
A0A1D8PHS4	orf19.2256		Ortholog of S. cerevisiae : YCR051W, C. glabrata CBS138 : CAGL0C03003g, C. dubliniensis CD36 : Cd36_21290, C. parapsilosis CDC317 : CPAR2_406670 and Candida tenuis NRRL Y-1498 : CANTEDRAFT_113636	5.72208e-06	5.61173e-06			2	5.66691e-06
Q5AHH6	orf19.820	SDS22	Putative regulatory subunit of the PP1 phosphatase Glc7p; involved in dephosphorylation of Rad53p in order to deactivate DNA damage checkpoint; macrophage/pseudohyphal-repressed		7.56613e-06	3.19586e-06		2	5.381e-06
A0A1D8PMR2	orf19.3099	TRP4	Predicted enzyme of amino acid biosynthesis; upregulated in biofilm; regulated by Gcn2p and Gcn4p; S. cerevisiae ortholog is Gcn4p regulated	5.75308e-06	4.53755e-06			2	5.14532e-06
A0A1D8PSD0	orf19.2419	DOM34	Endonuclease involved in regulation of translation; stimulates translation of protein O-mannosyltransferase family which includes PMT1, PMT2, PMT4, PMT5, and PMT6; peloto ortholog; Hap43-repressed gene	1.27284e-06		8.80171e-06		2	5.03727e-06
Q59ZI9	orf19.3530	CKA2	Catalytic alpha-subunit of protein kinase CK2; interaction with calcineurin pathway affects fluconazole sensitivity; synthetically lethal with CKA1; attenuated virulence in a mouse oropharyngeal candidiasis but not in a systemic mouse model	3.51471e-06	6.1777e-06			2	4.8462e-06
Q5A1L8	orf19.1977	URA4	Dihydroorotase; protein present in exponential and stationary growth phase yeast cultures	3.5224e-06	6.03869e-06			2	4.78055e-06
A0A1D8PG37	orf19.2091		Putative NADH dehydrogenase; repressed by nitric oxide, Hap43p-repressed	3.42325e-06		6.08675e-06		2	4.755e-06
Q59TS4	orf19.1170	ARO7	Putative chorismate mutase; fungal-specific (no human or murine homolog); alkaline upregulated	2.95776e-06	6.52752e-06			2	4.74264e-06
A0A1D8PHR9	orf19.2245	YPT72	Vacuolar Rab small monomeric GTPase involved in vacuolar biogenesis; involved in filamentous growth and virulence	2.38671e-06	6.8685e-06			2	4.6276e-06
A0A1D8PFT9	orf19.7216	YPT52	Rab-family GTPase involved in vacuolar trafficking, colocolizes with Vps1p and Ypt53p in late endosome	3.81256e-06	4.73877e-06			2	4.27566e-06
A0A1D8PSH3	orf19.4393	CIT1	Citrate synthase; induced by phagocytosis; induced in high iron; Hog1-repressed; Efg1-regulated under yeast, not hyphal growth conditions; present in exponential and stationary phase; Spider biofilm repressed; rat catheter biofilm induced		6.31232e-06	2.04993e-06		2	4.18112e-06
A0A1D8PTC7	orf19.1841		Protein of unknown function; Hap43-induced gene	5.11614e-06		3.24301e-06		2	4.17958e-06
Q59UF6	orf19.2408		Ortholog(s) have tRNA methyltransferase activity and role in tRNA methylation, wybutosine biosynthetic process	3.11689e-06	4.92751e-06			2	4.0222e-06
A0A1D8PHY7	orf19.1860.1		Ortholog(s) have extracellular region localization	2.83893e-06		5.09144e-06		2	3.96518e-06
A0A1D8PP77	orf19.4032	RPN5	Putative COP9 signalosome component; macrophage/pseudohyphal-repressed		5.48453e-06	1.67821e-06		2	3.58137e-06
P0CY20	orf19.99	HAL21	Putative phosphoadenosine-5'-phosphate or 3'-phosphoadenosine 5'-phosphosulfate phosphatase; possible role in sulfur recycling; ortholog of S. cerevisiae Met22; predicted Kex2 substrate; F-12/CO2 biofilm induced	3.49992e-06		3.03581e-06		2	3.26786e-06
Q59Z38	orf19.2262	ZTA1	Protein similar to quinone oxidoreductases; induced by benomyl treatment, nitric oxide; oxidative stress-induced via Cap1; stationary-phase enriched protein; Spider biofilm induced	2.52848e-06	3.85602e-06			2	3.19225e-06
Q5A5N1	orf19.5368		Ortholog of Vms1; component of a Cdc48-complex involved in protein quality control in S. cerevisiae; Spider biofilm repressed	9.93676e-07	4.51446e-06			2	2.75407e-06
A0A1D8PRL6	orf19.7520	POT1	Putative peroxisomal 3-oxoacyl CoA thiolase; transcript regulated by Nrg1 and Mig1; farnesol regulated; Hap43-repressed	1.76672e-06		3.16633e-06		2	2.46653e-06
Q59Q44	orf19.20	RTS1	Putative serine/threonine-protein phosphatase B-type regulatory subunit; transcription is regulated upon yeast-hyphal switch		3.03726e-06	1.74004e-06		2	2.38865e-06
A0A1D8PSW6	orf19.6306	ALD4	Trimethylaminobutyraldehyde dehydrogenase, the third enzyme of the carnitine biosynthesis pathway	1.44585e-06	2.7998e-06			2	2.12283e-06
Q5AP87	orf19.4878		Protein of unknown function; Hap43-repressed; rat catheter biofilm repressed	9.47094e-07	2.7257e-06			2	1.8364e-06
A0A1D8PMP1	orf19.3133	GUT2	Glycerol-3-phosphate dehydrogenase; Plc1p-regulated; rat catheter biofilm induced; Spider biofilm induced	1.06163e-06	2.58864e-06			2	1.82513e-06
A0A1D8PU51	orf19.7590		Putative NADH-ubiquinone oxidoreductase; identified in detergent-resistant membrane fraction (possible lipid raft component); predicted N-terminal acetylation; repressed by nitric oxide	1.12553e-06		1.29083e-06		2	1.20818e-06
A0A1D8PDF0	orf19.48	RPM2	Mitochondrial RNase P subunit; roles in nuclear transcription, cytoplasmic and mitochondrial RNA processing, mitochondrial translation; virulence-group-correlated expression; likely essential (UAU1 method); rat catheter biofilm induced	7.53121e-07		4.55991e-07		2	6.04556e-07
A0A1D8PS14	orf19.2568	IFU5	Predicted membrane protein; estradiol-induced; upregulation associated with CDR1 and CDR2 overexpression or fluphenazine; putative drug-responsive regulatory site; similar to S. cerevisiae Wwm1p; Hap43-repressed; Spider biofilm repressed				0.000363325	1	0.000363325
Q5ALP8	orf19.1527		Protein of unknown function; Spider biofilm induced				0.000119763	1	0.000119763
Q5A030	orf19.4358		Putative protein of unknown function; Hap43p-repressed gene; S. cerevisiae ortholog YDL157C localizes to mitochondria				0.00011485	1	0.00011485
Q5AJ69	orf19.1723		Ortholog(s) have role in response to purine-containing compound				0.000114753	1	0.000114753
A0A1D8PRK7	orf19.7140	CMT1	Putative catechol o-methyltransferase; stationary phase enriched protein; transcription upregulated in clinical isolates from HIV+ patients with oral candidiasis; Spider biofilm repressed				0.000110827	1	0.000110827
G1UAZ9	orf19.5158		Protein with similarity to a human gene associated with colon cancer and to orf19.5158; regulated by Gcn4, Cyr1; induced by amino acid starvation; macrophage-induced protein, macrophage-repressed; Spider biofilm induced				0.000110456	1	0.000110456
Q5ADQ9	orf19.6782	BMT1	Beta-mannosyltransferase, required for addition of the 1st beta-mannose residue to acid-stable fraction of cell wall phosphopeptidomannan; 9-gene family member; mutants induce higher levels of inflammatory cytokines in mouse dendritic cells			9.50545e-05		1	9.50545e-05
A0A1D8PLA9	orf19.4647	HAP3	Predicted CCAAT-binding transcription factor that regulates respiration; Cap2-dependent induction in low iron; opaque specific, alkaline, ciclopirox olamine induced; regulated by Sef1, Sfu1, Hap43; Bcr1-regulated in RPMI a/a biofilms				8.18033e-05	1	8.18033e-05
A0A1D8PTB8	orf19.2369.1	ATX1	Putative cytosolic copper metallochaperone; flucytosine induced; Ssr1-repressed; rat catheter biofilm induced		6.21546e-05			1	6.21546e-05
Q5A4K9	orf19.3432		Predicted membrane transporter, member of the drug:proton antiporter (12 spanner) (DHA1) family, major facilitator superfamily (MFS); induced by nitric oxide		5.94403e-05			1	5.94403e-05
A0A1D8PTV7	orf19.7297		Putative cystathionine gamma-synthase; decreased levels in stationary phase cultures; Hog1p-induced; Gcn4p-regulated		5.70421e-05			1	5.70421e-05
Q5AMQ6	orf19.4590	RFX2	Transcriptional repressor; regulator of filamentation, response to DNA damage, adhesion, virulence in murine mucosal, systemic infections; RFX domain; regulated by Nrg1, UV-induced; partially complements S. cerevisiae rfx1 mutant defects				5.36965e-05	1	5.36965e-05
Q5AEE2	orf19.326		Protein of unknown function; Spider biofilm repressed		4.86218e-05			1	4.86218e-05
A0A1D8PEH4	orf19.4758		Putative reductase or dehydrogenase; Hap43-repressed gene; alkaline repressed		4.78454e-05			1	4.78454e-05
Q59U59	orf19.1891	APR1	Vacuolar aspartic proteinase; transcript equivalent in yeast-form and mycelial cells but is elevated at lower growth temperatures; upregulated iby human neutrophils; protein enriched in stationary phase; Spider biofilm induced				4.20883e-05	1	4.20883e-05
P0CY19	orf19.3322	DUT1	dUTP pyrophosphatase; cell-cycle regulated if expressed in S. cerevisiae; upstream MluI and SCB elements; 17-beta-estradiol, ethynyl estradiol, macrophage induced; decreased in stationary phase yeast; rat catheter, Spider biofilm repressed		4.00278e-05			1	4.00278e-05
Q5AEE8	orf19.320	RSD1	Predicted short chain dehydrogenase; Spider biofilm induced				3.31725e-05	1	3.31725e-05
A0A1D8PKX3	orf19.364	VMA6	Putative vacuolar H+-ATPase subunit; required for proper vacuolar ATPase assembly and vacuolar functions; Spider biofilm repressed		3.0789e-05			1	3.0789e-05
A0A1D8PTW1	orf19.7316		Putative phytanoyl-CoA dioxygenase family protein; mutation confers hypersensitivity to 5-fluorocytosine (5-FC), 5-fluorouracil (5-FU), and tubercidin (7-deazaadenosine); induced by nitric oxide				3.02516e-05	1	3.02516e-05
A0A1D8PTW9	orf19.7306		Aldo-keto reductase; increased transcript associated with MDR1 overexpression, benomyl or long-term fluconazole treatment; overexpression does not affect drug or oxidative stress sensitivity; stationary phase enriched; flow biofim repressed		2.96468e-05			1	2.96468e-05
A0A1D8PPC2	orf19.1202		Ortholog of C. dubliniensis CD36 : Cd36_60350, C. parapsilosis CDC317 : CPAR2_603550, C. auris B8441 : B9J08_000521 and Candida tenuis NRRL Y-1498 : CANTEDRAFT_114325				2.86649e-05	1	2.86649e-05
Q5ALX8	orf19.1448	APT1	Adenine phosphoribosyltransferase; flucytosine induced; repressed by nitric oxide; protein level decreased in stationary phase yeast cultures	2.48644e-05				1	2.48644e-05
Q5AGD1	orf19.4248		Ortholog of S. cerevisiae YLR118C (alias Apt1); acyl-protein thioesterase responsible for depalmitoylation of Gpa1 in S. cerevisiae; regulated by Gcn4; repressed in response to amino acid starvation (3AT); rat catheter biofilm repressed		2.37292e-05			1	2.37292e-05
Q5A339	orf19.6424	UBC9	Ortholog(s) have SUMO conjugating enzyme activity, SUMO transferase activity, role in DNA repair, hyphal growth, mitotic spindle elongation and condensed nuclear chromosome, nuclear heterochromatin, nucleus localization	2.17322e-05				1	2.17322e-05
Q5A4P1	orf19.3401	CTA1	Protein similar to S. cerevisiae Mos10p, which affects S. cerevisiae filamentous growth; activates transcription in 1-hybrid assay in S. cerevisiae; protein levels increase under weak acid stress; nonessential		2.168e-05			1	2.168e-05
A0A1D8PRL3	orf19.7531		Protein of unknown function; stationary phase enriched protein; induced upon yeast-hypha transition; benomyl or caspofungin induced; Hap43-repressed; Spider biofilm induced		2.13951e-05			1	2.13951e-05
Q5A1Z4	orf19.2849	AQY1	Aquaporin water channel; osmotic shock resistance, WT freeze tolerance; virulent in mice; flucytosine repressed; flow model/RPMI/Spider/rat catheter biofilm induced; required for RPMI biofilm formation; Bcr1-induced in a/a RPMI biofilms		2.12585e-05			1	2.12585e-05
Q5A432	orf19.1275	GAT1	GATA-type transcription factor; regulator of nitrogen utilization; required for nitrogen catabolite repression and utilization of isoleucine, tyrosine and tryptophan N sources; required for virulence in a mouse systemic infection model				2.05707e-05	1	2.05707e-05
A0A1D8PEE6	orf19.4735		Ornithine cyclodeaminase family protein; Sef1, Sfu1, and Hap43-regulated; ortholog of S. cerevisiae YGL159W and S. pombe SPAP11E10.01; rat catheter biofilm induced		1.96544e-05			1	1.96544e-05
Q5A0H8	orf19.5833	UFD1	Ortholog(s) have SUMO binding, polyubiquitin modification-dependent protein binding, ubiquitin binding activity		1.89109e-05			1	1.89109e-05
Q59NX9	orf19.6676	DPH51	Has domain(s) with predicted diphthine synthase activity, methyltransferase activity and role in metabolic process, peptidyl-diphthamide biosynthetic process from peptidyl-histidine		1.78951e-05			1	1.78951e-05
Q59MT3	orf19.1857	SPT1	Putative L-azetidine-2-carboxylic acid acetyltransferase; mutants are viable		1.774e-05			1	1.774e-05
A0A1D8PJH8	orf19.234	PHA2	Putative prephenate dehydratase; Hap43p-repressed gene; expression downregulated in an ssr1 null mutant				1.74108e-05	1	1.74108e-05
A0A1D8PE63	orf19.5059	GCS1	Gamma-glutamylcysteine synthetase; glutathione synthesis, required for virulence;induced in low iron, H2O2, Cd, or presence of human neutrophils; possibly adherence-induced; Spider and F-12/CO2 biofilm induced				1.73826e-05	1	1.73826e-05
A0A1D8PMG0	orf19.4406	NIF3	Protein of unknown function; ortholog of S. cerevisiae Nif3; rat catheter biofilm repressed	1.73287e-05				1	1.73287e-05
Q59T88	orf19.4543	UGA2	Predicted succinate semialdehyde dehydrogenase; predicted role in glutamate catabolism; transcription regulated by Mig1, Tup1, Gcn4; mutants are viable				1.62776e-05	1	1.62776e-05
Q5A933	orf19.3301	MET30	Putative ubiquitin ligase complex component; induced by heavy metal (cadmium) stress; Hog1-induced; transcript induced by Mnl1p under weak acid stress; flow model biofilm induced; Spider biofilm induced		1.55096e-05			1	1.55096e-05
A0A1D8PDR9	orf19.6272	YUH1	Putative ubiquitin C-terminal hydrolase; regulated by Gcn2p and Gcn4p		1.52297e-05			1	1.52297e-05
A0A1D8PQC2	orf19.1212		Ortholog(s) have FFAT motif binding, phosphatidylinositol binding activity		1.47745e-05			1	1.47745e-05
A0A1D8PJ02	orf19.5380	LYS144	Zn(II)2Cys6 transcription factor; has similarity to S. cerevisiae Lys14, involved in the regulation of lysine biosynthesis genes				1.38939e-05	1	1.38939e-05
Q59PW1	orf19.2782	GRX5	Ortholog(s) have 2 iron, 2 sulfur cluster binding, disulfide oxidoreductase activity, glutathione disulfide oxidoreductase activity	1.25453e-05				1	1.25453e-05
A0A1D8PPG2	orf19.4193		Ortholog(s) have Arp2/3 complex binding activity, role in actin cortical patch assembly, actin filament debranching, negative regulation of Arp2/3 complex-mediated actin nucleation and actin cortical patch, cytoplasm localization		1.21141e-05			1	1.21141e-05
A0A1D8PQT6	orf19.6912		Putative ethanolamine kinase		1.17879e-05			1	1.17879e-05
Q5ACW5	orf19.2102	CKB1	Regulatory subunit of protein kinase CK2 (casein kinase II), beta subunit; null mutants are hypersensitive to caspofungin and hydrogen peroxide medium	1.13569e-05				1	1.13569e-05
Q5ANA9	orf19.5994	RHB1	Putative small G protein from the Ras superfamily involved in cell wall integrity and control of filamentous growth under nitrogen starvation; involved in activation of TOR1C during starvation response		1.13201e-05			1	1.13201e-05
Q5AEB5	orf19.353	ULP1	SUMO deconjugation enzyme that cleaves the small ubiquitin-like modifier (SUMO) off proteins		1.11228e-05			1	1.11228e-05
A0A1D8PJL5	orf19.233.1	HRT1	Ortholog of S. cerevisiae Hrt1; component of a nuclear ubiquitin-protein ligase complex involved in cell cycle control; induced by hydroxyurea; Spider biofilm induced	1.06415e-05				1	1.06415e-05
A0A1D8PQN6	orf19.7034		Putative eIF4E-associated protein;, accelerates mRNA degradation by promoting decapping; Spider biofilm repressed		1.0558e-05			1	1.0558e-05
Q5APP3	orf19.4722	RTG1	RNA polymerase II transcription factor involved in regulation of galactose catabolism genes; as result of transcriptional rewiring, performs role analogous to Gal4p in S. cerevisiae	9.87022e-06				1	9.87022e-06
A0A1D8PGH6	orf19.1534	ZRT3	Ortholog of S. cerevisiae Zrt3, vacuolar membrane zinc transporter; predicted Kex2 substrate; induced in oralpharyngeal candidasis; flow model biofilm induced; Spider biofilm induced		9.32058e-06			1	9.32058e-06
Q5AP65	orf19.4898		Putative protein of unknown function; induced by prostaglandins		8.6538e-06			1	8.6538e-06
Q59YE9	orf19.1377	IPK2	Putative inositol polyphosphate multikinase; involved in regulation of calcium homeostasis, secretion and hyphal growth				8.62931e-06	1	8.62931e-06
A0A1D8PII4	orf19.1776		Putative pantetheine-phosphate adenylyltransferase (PPAT); which catalyzes 4th step in coenzyme A biosynthesis from pantothenate; rat catheter biofilm repressed		8.37992e-06			1	8.37992e-06
A0A1D8PRJ1	orf19.4536	CYS4	Cystathionine beta-synthase; sulfur amino acid biosynthesis; antigenic in mouse; flow model biofilm induced; alkaline induced; macrophage/pseudohyphal-induced; present in exponential and stationary growth phase yeast cultures	8.2971e-06				1	8.2971e-06
A0A1D8PDA0	orf19.5194.1		Putative protein of unknown function; clade-associated gene expression		7.9866e-06			1	7.9866e-06
Q59X29	orf19.4102	RPN10	Putative 19S regulatory particle of the 26S proteasome; macrophage/pseudohyphal-repressed; regulated by Gcn2 and Gcn4; Spider biofilm repressed		7.78774e-06			1	7.78774e-06
Q5A784	orf19.5078	OFR1	Protein involved in regulation of white-opaque switching; Hap43-repressed gene; rat catheter biofilm repressed	7.75192e-06				1	7.75192e-06
A0A1D8PU27	orf19.7552		Putative U3-containing small subunit processome complex protein; Hap43-induced gene; repressed in core stress response; Spider biofilm induced			7.74511e-06		1	7.74511e-06
A0A1D8PD50	orf19.1027	PDR16	Phosphatidylinositol transfer protein; induction correlates with CDR1, CDR2 overexpression/azole resistance; fluphenazine, 17-beta-estradiol, ethynyl estradiol, NO induced; farnesol-downregulated in biofilm; rat catheter biofilm induced				7.64675e-06	1	7.64675e-06
Q5A923	orf19.3311	IFD3	Putative aldo/keto reductase; Mig1-regulated		7.35657e-06			1	7.35657e-06
O74189	orf19.5171	PMT1	Protein mannosyltransferase; required for virulence in mice and for adhesion to epithelial cells; role in hyphal growth and drug sensitivity; Als1, Sec20, Kre9, Pir1 are substrates; 1 of 5 PMT family members				7.09024e-06	1	7.09024e-06
Q5A0W0	orf19.3136	USP1	Ortholog(s) have transcription coactivator activity and role in carbon catabolite regulation of transcription from RNA polymerase II promoter		6.99477e-06			1	6.99477e-06
A0A1D8PP03	orf19.3932.1		Has domain(s) with predicted nucleic acid binding, nucleotide binding activity	6.80169e-06				1	6.80169e-06
Q59Z55	orf19.2244		Similar to oxidoreductases and to S. cerevisiae Yjr096wp; Sfu1 repressed; induced by benomyl treatment, Ssr1; Hap43-repressed; flow model biofilm repressed		6.74087e-06			1	6.74087e-06
A0A1D8PLX8	orf19.1596	FGR28	Protein lacking an ortholog in S. cerevisiae; transposon mutation affects filamentous growth; possibly an essential gene, disruptants not obtained by UAU1 method	6.73555e-06				1	6.73555e-06
Q59Z17	orf19.2283	DQD1	Putative 3-dehydroquinate dehydratase; ketoconazole-repressed; protein abundance downregulated by macrophages; flow model biofilm induced	6.2685e-06				1	6.2685e-06
Q59WC5	orf19.4444	PHO15	HAD-family 2-phosphoglycolate phosphatase, likely involved in a metabolic repair system, not in protein dephosphorylation; involved in regulation of white-opaque switch; hyphal repressed; induced in core stress response		6.15805e-06			1	6.15805e-06
A0A1D8PU13	orf19.6597		Ortholog of S. cerevisiae : YLR287C, C. glabrata CBS138 : CAGL0M09757g, C. dubliniensis CD36 : Cd36_34830, C. parapsilosis CDC317 : CPAR2_701110 and Candida tenuis NRRL Y-1498 : CANTEDRAFT_114424		6.09778e-06			1	6.09778e-06
Q5A932	orf19.3302		Putative type-1 protein phosphatase targeting subunit; transcript repressed by yeast-hyphal switch; transcript induced by Mnl1p under weak acid stress; flow model biofilm induced				6.0328e-06	1	6.0328e-06
Q5AML2	orf19.4634		Protein required for thiolation of uridine at wobble position of Gln, Lys, and Glu tRNAs; has a role in urmylation; S. cerevisiae ortholog has a role in invasive and pseudohyphal growth	5.60263e-06				1	5.60263e-06
Q5AKU3	orf19.5034	YBP1	Protein involved in response to oxidative stress, binds and stabilizes Cap1p transcription factor in response to H2O2; essential for macrophage killing		5.15064e-06			1	5.15064e-06
A0A1D8PR61	orf19.6453		Ortholog of C. dubliniensis CD36 : Cd36_72300, C. parapsilosis CDC317 : CPAR2_703060, C. auris B8441 : B9J08_001030 and Candida tenuis NRRL Y-1498 : CANTEDRAFT_92002		5.0333e-06			1	5.0333e-06
A0A1D8PHB0	orf19.3545	CDC15	Putative protein serine/threonine kinase, essential for mitotic exit and cytokinesis; localized to the spindle pole body	4.99628e-06				1	4.99628e-06
P0C8K9		COX1	Subunit I of cytochrome c oxidase, which is the terminal member of the mitochondrial (mt) inner membrane electron transport chain; one of three mt-encoded subunits; alternatively spliced transcripts encode 4 putative splicing endonucleases	4.74911e-06				1	4.74911e-06
A0A1D8PSW5	orf19.1806		Ortholog of C. dubliniensis CD36 : Cd36_30340, C. parapsilosis CDC317 : CPAR2_203900, Candida tenuis NRRL Y-1498 : CANTEDRAFT_113094 and Debaryomyces hansenii CBS767 : DEHA2G22374g	4.48624e-06				1	4.48624e-06
Q5A441	orf19.1267	DJP2	Ortholog of S. cerevisiae : CAJ1, C. glabrata CBS138 : CAGL0J02750g, C. dubliniensis CD36 : Cd36_45380, C. parapsilosis CDC317 : CPAR2_500650 and C. auris B8441 : B9J08_005169				4.47503e-06	1	4.47503e-06
A0A1D8PP62	orf19.4003	TIP20	Protein interacting with Sec20p, possibly involved in retrograde transport between the Golgi and the endoplasmic reticulum; similar to S. cerevisiae Tip20p		4.38464e-06			1	4.38464e-06
A0A1D8PDH5	orf19.59	REI1	Putative cytoplasmic pre-60S factor; Hap43-induced; repressed by prostaglandins	4.2618e-06				1	4.2618e-06
A0A1D8PR90	orf19.5139	LPF33	Ortholog of C. dubliniensis CD36 : Cd36_72800, Candida tropicalis MYA-3404 : CTRG_05211 and Candida albicans WO-1 : CAWG_05649		4.06626e-06			1	4.06626e-06
A0A1D8PH18	orf19.837.1	INO4	Transcription factor; activator that forms a heterodimer with Ino2; likely regulates genes involved in phosphatidylcholine and phosphatidylinositol biosynthesis, fatty acid beta-oxidation, and peroxisome biogenesis; gene has intron	3.92854e-06				1	3.92854e-06
Q5AG40	orf19.4339	VPS4	AAA-ATPase involved in transport from MVB to the vacuole and ESCRT-III complex disassembly; mutation decreases SAP secretion and virulence in murine intravenous infection; regulated by Gcn2p, Gcn4p; required for normal Rim8p processing		3.92388e-06			1	3.92388e-06
Q5AM50	orf19.1525	NMD4	Ortholog(s) have role in nuclear-transcribed mRNA catabolic process, nonsense-mediated decay		3.84818e-06			1	3.84818e-06
Q5AAG6	orf19.7523	MKC1	MAP kinase; role in biofilm formation, contact-induced invasive filamentation, systemic virulence in mouse, cell wall structure/maintenance, caspofungin response; phosphorylated on surface contact, membrane perturbation, or cell wall stress	3.82851e-06				1	3.82851e-06
A0A1D8PQN8	orf19.7052	INP52	Putative polyphosphatidylinositol phosphatase; possibly an essential gene, disruptants not obtained by UAU1 method		3.82719e-06			1	3.82719e-06
Q5A1X9	orf19.2426		Predicted HD domain metal dependent phosphohydrolase; Spider biofilm repressed		3.58695e-06			1	3.58695e-06
A0A1D8PKH6	orf19.7376		Ortholog of C. dubliniensis CD36 : Cd36_85880, C. parapsilosis CDC317 : CPAR2_806870, C. auris B8441 : B9J08_002007 and Candida tenuis NRRL Y-1498 : CANTEDRAFT_96983	3.35186e-06				1	3.35186e-06
Q5AJC1	orf19.1670	BRO1	Class E vacuolar protein sorting factor; role in transport from multivesicular body to vacuole; not involved in Rim101 pathway; macrophage and pseudohyphal-repressed; flow model biofilm induced		3.16606e-06			1	3.16606e-06
Q5ALW6	orf19.1460		Putative glutamine-dependent NAD synthetase, involved in NAD salvage pathway		3.07561e-06			1	3.07561e-06
Q5AMN5	orf19.4611	PRS4	Ortholog(s) have ribose phosphate diphosphokinase activity, role in 5-phosphoribose 1-diphosphate biosynthetic process, cytokinesis, fungal-type cell wall organization and ribose phosphate diphosphokinase complex localization	2.87071e-06				1	2.87071e-06
Q5A362	orf19.6402	CYS3	Cystathionine gamma-lyase; induced by alkaline, amphotericin B, cadmium stress, oxidative stress via Cap1; possibly adherence-induced; Hog1 regulated; reduced levels in stationary phase yeast cells; Spider and flow model biofilm induced			2.83059e-06		1	2.83059e-06
A0A1D8PEW0	orf19.998		Putative adapter protein; links synaptojanins Inp52 and Inp53 to the cortical actin cytoskeleton in S. cerevisiae; mutants are viable		2.80469e-06			1	2.80469e-06
A0A1D8PF50	orf19.665	NEP1	Ortholog(s) have rRNA (pseudouridine) methyltransferase activity	2.67232e-06				1	2.67232e-06
A0A1D8PN40	orf19.1943		Ortholog of C. dubliniensis CD36 : Cd36_51070, C. parapsilosis CDC317 : CPAR2_302610, Candida tropicalis MYA-3404 : CTRG_05379, Candida albicans WO-1 : CAWG_04514 and Candida metapsilosis : CMET_1253	2.42453e-06				1	2.42453e-06
A0A1D8PMF7	orf19.1272		Protein of unknown function; may play a role in regulation of cell size; rat catheter biofilm repressed	2.29189e-06				1	2.29189e-06
A0A1D8PL37	orf19.4177	HIS5	Putative histidinol-phosphate aminotransferase; Gcn4p-regulated; protein present in exponential and stationary growth phase yeast cultures	2.20592e-06				1	2.20592e-06
A0A1D8PMB8	orf19.1235	HOM3	Putative L-aspartate 4-P-transferase; fungal-specific (no human or murine homolog); regulated by Gcn2 and Gcn4; early-stage flow model biofilm induced	2.10354e-06				1	2.10354e-06
A0A1D8PS00	orf19.2541		Ortholog(s) have 3'-5'-exodeoxyribonuclease activity, endonuclease activity and role in apoptotic DNA fragmentation, cellular response to oxidative stress	1.94449e-06				1	1.94449e-06
A0A1D8PQ06	orf19.5561	STE23	Ortholog of S. cerevisiae Ste23 metalloprotease; role in N-terminal processing of pro-a-factor to the mature form; Tn mutation affects filamentous growth; Spider biofilm induced		1.87457e-06			1	1.87457e-06
A0A1D8PPC6	orf19.4209	UBA3	Ortholog(s) have NEDD8 activating enzyme activity and role in protein neddylation	1.86265e-06				1	1.86265e-06
Q5A6Q0	orf19.504	ARP5	Ortholog(s) have ATP-dependent 3'-5' DNA helicase activity	1.8474e-06				1	1.8474e-06
A0A1D8PF53	orf19.1166	CTA3	Protein similar to S. cerevisiae Ede1p, which is involved in endocytosis; activates transcription in 1-hybrid assay in S. cerevisiae		1.81244e-06			1	1.81244e-06
A0A1D8PME3	orf19.1264	CFL2	Oxidoreductase; iron utilization; Sfu1/Sef1/Hap43/Nrg1/Tup1/Rim101 regulated; alkaline/low iron/fluphenazine/ciclopirox olamine, flucytosine, fluconazole, Spider/flow model/rat catheter biofilm induced; caspofungin/amphotericin B repressed		1.75622e-06			1	1.75622e-06
A0A1D8PIJ4	orf19.1381	LSB5	Ortholog of S. cerevisiae/S. pombe Lsb5; predicted role in actin cortical patch localization, actin filament organization, endocytosis; flow model biofilm induced; Spider biofilm repressed	1.67356e-06				1	1.67356e-06
Q5AEI0	orf19.288	MET13	Putative methionine biosynthesis protein; ketoconazole-induced; amphotericin B repressed; Spider biofilm repressed			1.59669e-06		1	1.59669e-06
Q5APB9	orf19.4846		GlcNAc-induced protein			1.56202e-06		1	1.56202e-06
A0A1D8PK69	orf19.6967	USO6	Putative vesicular transport protein; transcript induced by filamentous growth; rat catheter biofilm repressed		1.51294e-06			1	1.51294e-06
A0A1D8PHH7	orf19.5211	IDP1	Putative isocitrate dehydrogenase; transcriptionally induced by interaction with macrophage; alkaline induced; Spider biofilm repressed	1.4075e-06				1	1.4075e-06
Q59W62	orf19.663	GIN4	Autophosphorylated kinase; role in pseudohyphal-hyphal switch and cytokinesis; phosphorylates Cdc11p on S395; necessary for septin ring within germ tube but not for septin band at mother cell junction; physically associates with septins				1.40045e-06	1	1.40045e-06
A0A1D8PKC4	orf19.7367	UBP1	Ortholog(s) have thiol-dependent ubiquitin-specific protease activity, role in protein deubiquitination and cytoplasm, endoplasmic reticulum localization		1.24614e-06			1	1.24614e-06
P43075	orf19.6511	LIG1	tRNA ligase; functional homolog of S. cerevisiae Trl1	1.19356e-06				1	1.19356e-06
A0A1D8PLN7	orf19.2711	ELP2	Similar to S. cerevisiae Elp2, an Elongator complex subunit required for modification of wobble nucleosides in tRNA; repressed in core stress response	1.16227e-06				1	1.16227e-06
A0A1D8PSD4	orf19.2410	SYS3	Protein similar to S. cerevisiae Sys3p; putative role in endosome-Golgi vesicle docking; upregulated in biofilm; induced upon adherence to polystyrene		1.0113e-06			1	1.0113e-06
A0A1D8PNS3	orf19.1119	MTR10	Putative importin; member of a family of fungal-specific nuclear importins; Mig1-regulated	8.84806e-07				1	8.84806e-07
Q59YG7	orf19.1359		Ortholog(s) have protein-containing complex binding activity, role in sporulation resulting in formation of a cellular spore, ubiquitin-dependent ERAD pathway and extrinsic component of membrane, nucleus localization	8.65917e-07				1	8.65917e-07
A0A1D8PKB5	orf19.7371	ZCF35	Zn(II)2Cys6 transcription factor; Hap43-induced; Spider biofilm induced		8.25491e-07			1	8.25491e-07
A0A1D8PK53	orf19.5999	DYN1	Dynein heavy chain; motor protein that moves to microtubule minus end; required for yeast cell separation, spindle positioning, nuclear migration, hyphal growth; regulated by Mig1, Hap43; flow model and rat catheter biofilm repressed		7.28045e-07			1	7.28045e-07
A0A1D8PQF7	orf19.2143		Ortholog(s) have role in endocytic recycling and cytoplasm, endosome localization	5.8932e-07				1	5.8932e-07
