# Supplementary material for: Proteomic profiling of the monothiol glutaredoxin Grx3 reveals its global role in the regulation of iron dependent processes
Source: PLoS Genet. 2020 Jun 11;16(6):e1008881. doi: 10.1371/journal.pgen.1008881 (PMC7319344; doi:10.1371/journal.pgen.1008881)
Supplement: S4 Table — (XLSX) [file pgen.1008881.s004.xlsx]

## Sheet: Sheet1
S4 Table. Primers used in this study.
Number	Direction	Sequence (5'-3')	Purpose
1	F	CCCAACTTTTTGCAGTGGTTTAACTAATAATCAACTACAATGCCTACCTCACCTACA	pMAL2-SFU1-MYC generation
2	R	CACCGTTCAAGTCTTCCTCGGAGATTAGCTTTTGTTCTCCATTTAACAACTTCCCAAT
3	F	GAATTGTAATACGACTCACTATAGGGCGAATTGGGTACCAATGGTGGGTGTGTTTAT	pGRX3-GRX3-FLAG generation
4	R	AGCTTCTAAAGCATGTTCGAAG
5	F	TTGAAGATGATGAGAAATTCTTCGAACATGCTTTAGAAGCTGACTACAAAGACCATG
6	R	CTCTAGTTTTGACGGGATCCCCCGGGCTGCAGTCACTTGTCATCGTCATCCTTGTAAT
7	F	CAACTTTTTGCAGTGGTTTAACTAATAATCAACTACATATGGGAGTTATTGAAATCGAGT	pMAL2-GRX3-HBH generation
8	R	CCAGCATGATGGTGGTGATGATGTGAACCCCTGTTACGAGCTTCTAAAGCATGTTCGAAG
9	F	CCATTGGGTATGGGGAAATC	HIS3 integration
10	R	CGTTGTCGTTCAACTTTTTCA
11	F	CTAAAGGGAACAAAAGCTGGAGCTCCACCGCGGTGGCGGCCGCTGCTCCTCGTCGACAAC	pTDH3-GRX3 generation
12	R	CTGACTCGATTTCAATAACTCCCATTCTAGATAATTTGATTGTAAAGTTTGTTGATG
13	F	CTTTACAATCAAATTATCTAGAATGGGAGTTATTGAAATCGAGTCAG
14	R	CGACTCACTATAGGGCGAATTGGGTACCTTATCAAGCTTCTAAAGCATGTTCGAAGA
15	F	ATTACCCATGGTATGGATGAATTGTACAAAACGCGTATGCCCGCAAAAGGTCCTAATATT	pMAL2-GFP-HAP43 generation
16	R	GCGTAATACGACTCACTATAGGGCGAATTGGGTACCCTAATTATATGCTCTTCTATCTAA
17	F	TCCTAGACTAGTGCCGAATTA	pRBT5 qPCR
18	R	GAAGATTTGTGGGAAACATCAG
19	F	GCACCGCTCTCTCATTCACC	SFU1 qPCR
20	R	GTGGTTGTGATTGCGTCGGT
21	F	TCGATCTGCCACCGAATTGT	SEF1 qPCR
22	R	TCTCCACCACGATGTAGACCT
23	F	GGCTGTACCGGTAATCCAGGAA	HAP43 qPCR
24	R	ACCGACGAAGAGTGGGATGG
25	F	GGTAGCTGGTCCTGCCGCTA	CCP1 qPCR
26	R	ACCTGATGTATGCCATGCCAATCT
27	F	TGATGGTAGAGGTAACTTTG	ADE2 qPCR
28	R	TTTGGCTAATATAGATGCCT
29	F	CAAGTGTTTCTGACGCTTTG	RBT5 qPCR
30	R	TTCAGCCTTGGTGGTTTC
31	F	TGGAAGCTGCTGGTATTGAC	ACT1 qPCR
32	R	TTCAGCAATACCTGGGAACA
